# Supplementary material for: Synthesis of aryl cobalt and iron complexes and their catalytic activity on hydrosilylation of alkenes
Source: Royal Society of Chemistry journal article supplement (doi:10.1039/d1nj06133j), 2022-01-01
Supplement: d1nj06133j1.pdf [file d1nj06133j1.pdf]

## Supporting Information

### Synthesis of Aryl Cobalt and Iron Complexes and their Catalytic Activity on Hydrosilylation of Alkenes

Wei Huang,<sup>a</sup> Jiahui Lu,<sup>b</sup> Qingqing Fan,<sup>a</sup> Xiaoyan Li,<sup>a</sup> Alexander Hinz,<sup>c,\*</sup> Hongjian Sun,<sup>a,\*</sup>

<sup>a</sup>*School of Chemistry and Chemical Engineering, Key Laboratory of Special Functional Aggregated Materials, Ministry of Education, Shandong University, Shanda Nanlu 27, 250100 Jinan, People's Republic of China*

<sup>b</sup>*School of Chemistry and Chemical Engineering, University of Jinan, 250022 Jinan, People's Republic of China*

<sup>c</sup>*Karlsruhe Institute of Technology (KIT), Institute of Inorganic Chemistry, Engesserstr.15, 76131 Karlsruhe, Germany*

Correspondence author: [hjsun@sdu.edu.cn](mailto:hjsun@sdu.edu.cn)

## Contents

|                                                                                           |     |
|-------------------------------------------------------------------------------------------|-----|
| <b>S1.</b> Crystallographic Data for complexes <b>1-7</b>                                 | S2  |
| <b>S2.</b> IR spectra of complexes <b>1-7</b>                                             | S3  |
| <b>S3.</b> Mass spectrum of complex <b>5</b>                                              | S5  |
| <b>S4.</b> <sup>1</sup> H NMR and <sup>13</sup> C NMR Spectra of Hydrosilylation Products | S6  |
| <b>S5.</b> Reference                                                                      | S28 |

## S1.Crystallographic Data for Complexes1-7

| complex                       | 1                                                                  | 2                                                                | 4                                                                 | 6                                                                | 7                                                |
|-------------------------------|--------------------------------------------------------------------|------------------------------------------------------------------|-------------------------------------------------------------------|------------------------------------------------------------------|--------------------------------------------------|
| formula                       | C <sub>14</sub> H <sub>27</sub> ClCoF <sub>4</sub> NP <sub>3</sub> | C <sub>17</sub> H <sub>36</sub> F <sub>4</sub> FeNP <sub>4</sub> | C <sub>15</sub> H <sub>27</sub> ClF <sub>3</sub> FeP <sub>3</sub> | C <sub>22</sub> H <sub>32</sub> CoF <sub>4</sub> NP <sub>3</sub> | C <sub>25</sub> H <sub>37</sub> CoP <sub>3</sub> |
| <i>M<sub>c</sub></i>          | 472.65                                                             | 510.20                                                           | 486.57                                                            | 538.32                                                           | 489.38                                           |
| crystal system                | monoclinic                                                         | monoclinic                                                       | monoclinic                                                        | monoclinic                                                       | monoclinic                                       |
| space group                   | Cc                                                                 | P2 <sub>1</sub> /c                                               | C2/c                                                              | P2 <sub>1</sub> /c                                               | P2 <sub>1</sub>                                  |
| a [Å]                         | 9.2381(2)                                                          | 8.9999(2)                                                        | 15.0248(3)                                                        | 18.3827(5)                                                       | 8.8303(2)                                        |
| b [Å]                         | 15.2301(4)                                                         | 10.1154(2)                                                       | 9.0984(2)                                                         | 8.7737(2)                                                        | 16.4996(4)                                       |
| c [Å]                         | 15.7220(4)                                                         | 26.2786(5)                                                       | 31.9118(6)                                                        | 16.3807(4)                                                       | 9.2364(2)                                        |
| α [°]                         | 90                                                                 | 90                                                               | 90                                                                | 90                                                               | 90                                               |
| β [°]                         | 106.586(3)                                                         | 98.2920(18)                                                      | 95.403(2)                                                         | 102.742(3)                                                       | 96.734(2)                                        |
| γ [°]                         | 90                                                                 | 90                                                               | 90                                                                | 90                                                               | 90                                               |
| V [Å <sup>3</sup> ]           | 2119.99(9)                                                         | 2367.33(9)                                                       | 4343.01(15)                                                       | 2576.89(11)                                                      | 1336.43(5)                                       |
| T [K]                         | 173.00(10)                                                         | 172.99(10)                                                       | 173                                                               | 173.0                                                            | 173                                              |
| Z                             | 4                                                                  | 4                                                                | 8                                                                 | 4                                                                | 2                                                |
| μ[mm <sup>-1</sup> ]          | 9.947                                                              | 7.981                                                            | 9.162                                                             | 7.327                                                            | 6.781                                            |
| total reflns                  | 6948                                                               | 15188                                                            | 12589                                                             | 14681                                                            | 18004                                            |
| unique reflns                 | 2431                                                               | 4177                                                             | 3806                                                              | 4564                                                             | 5375                                             |
| R <sub>int</sub>              | 0.0528                                                             | 0.0527                                                           | 0.0547                                                            | 0.0703                                                           | 0.0723                                           |
| R <sub>1</sub> [I>2σ(I)]      | 0.0308                                                             | 0.0442                                                           | 0.0433                                                            | 0.0594                                                           | 0.0450                                           |
| wR(F <sup>2</sup> )[I>2σ(I)]  | 0.0753                                                             | 0.1082                                                           | 0.1049                                                            | 0.1361                                                           | 0.1170                                           |
| R <sub>1</sub> (all data)     | 0.0322                                                             | 0.0492                                                           | 0.0489                                                            | 0.0761                                                           | 0.0511                                           |
| wR(F <sup>2</sup> )(all data) | 0.0760                                                             | 0.1108                                                           | 0.1079                                                            | 0.1456                                                           | 0.1200                                           |
| GOF on F <sup>2</sup>         | 1.029                                                              | 1.055                                                            | 1.025                                                             | 1.075                                                            | 1.212                                            |

## S2 IR spectra of complexes 1-7

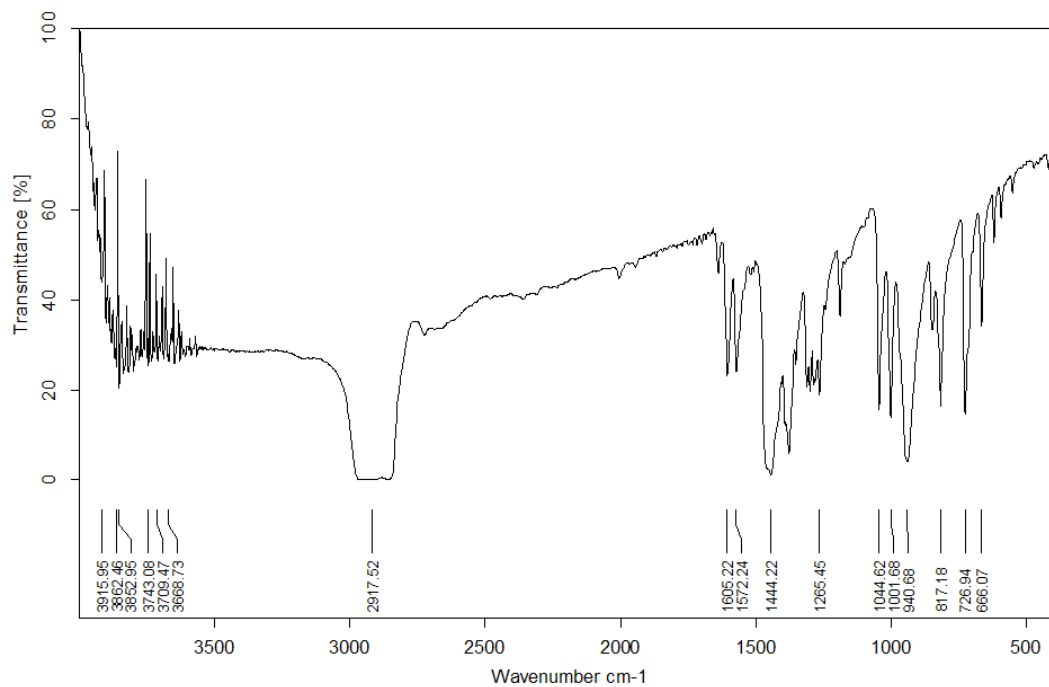

Fig.S1 IR spectrum of complex 1

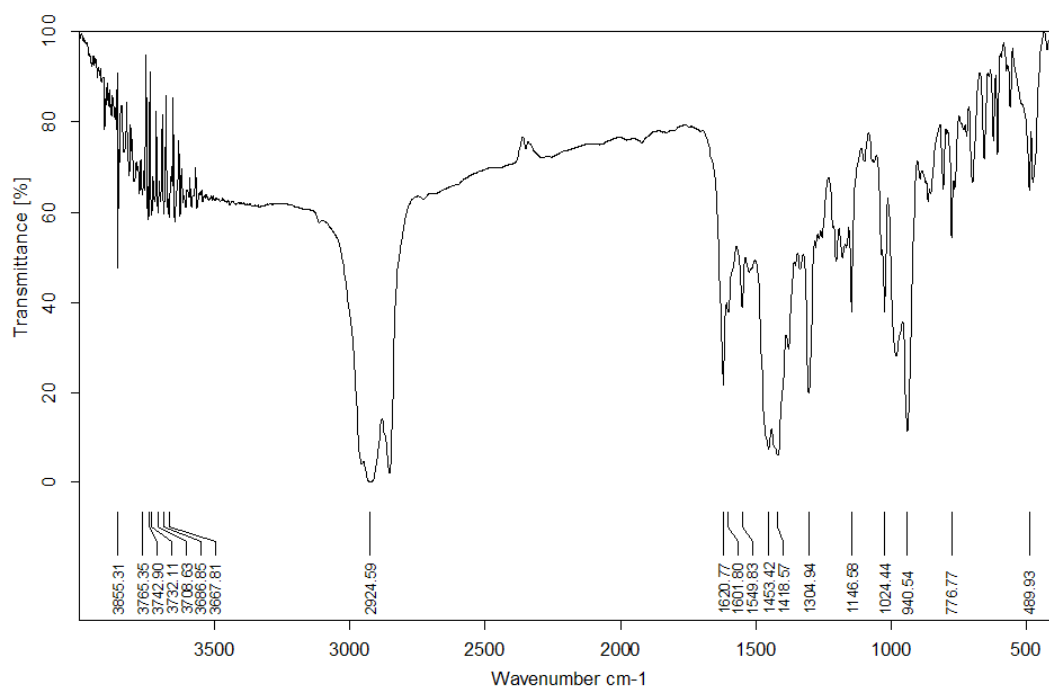

Fig.S2 IR spectrum of complex 2

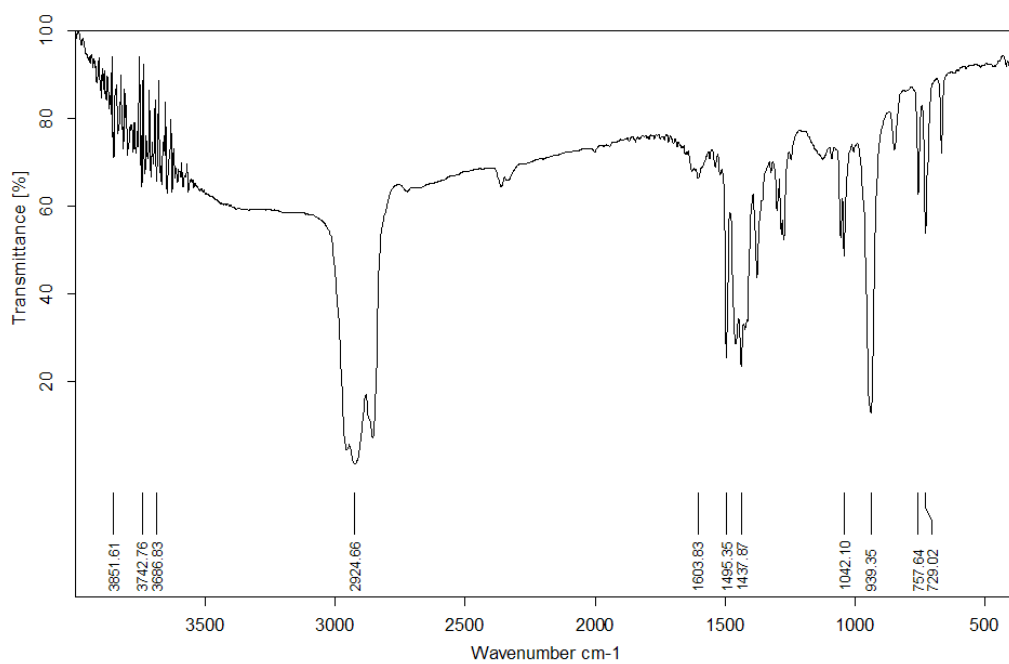

Fig.S3 IR spectrum of complex 4

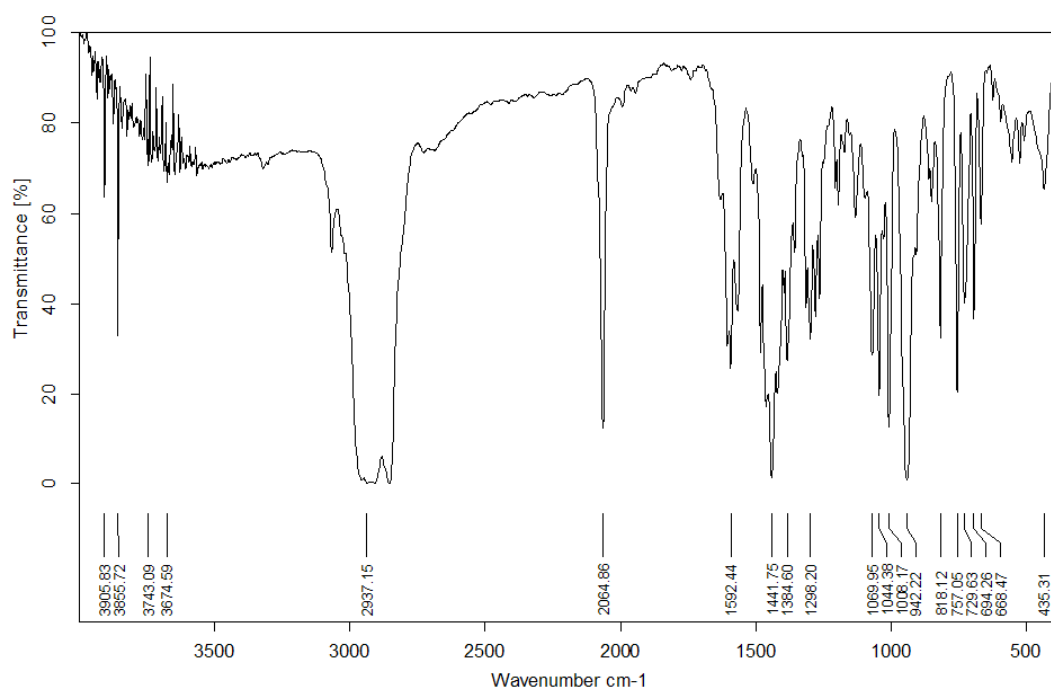

Fig.S4 IR spectrum of complex 6

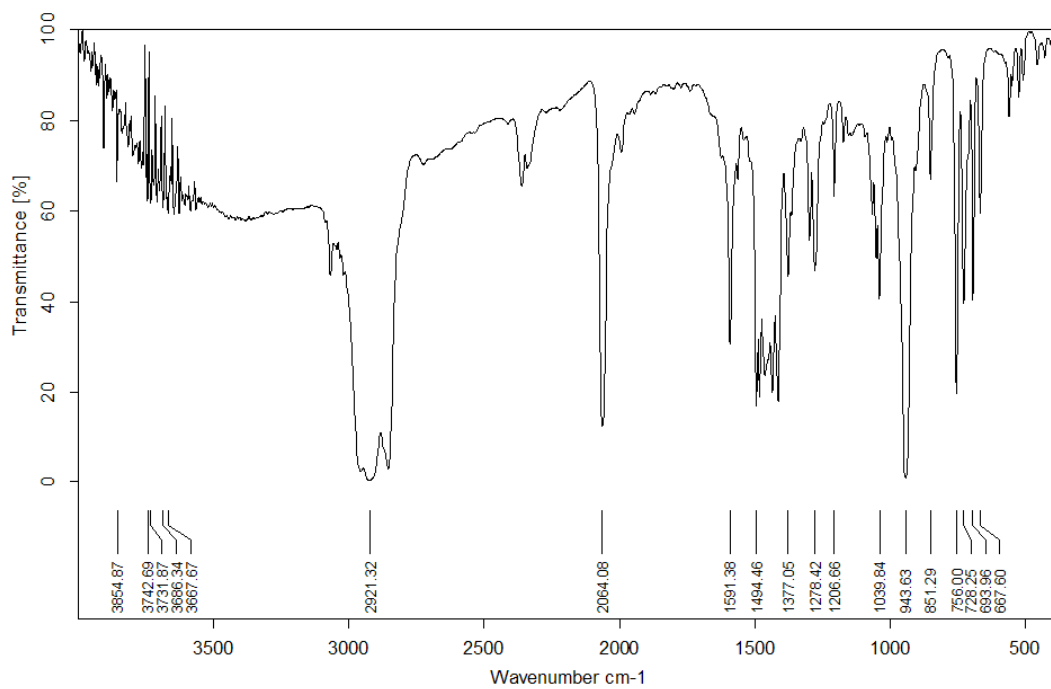

Fig.S5 IR spectrum of complex 7

### S3 Mass spectrum of complex 5

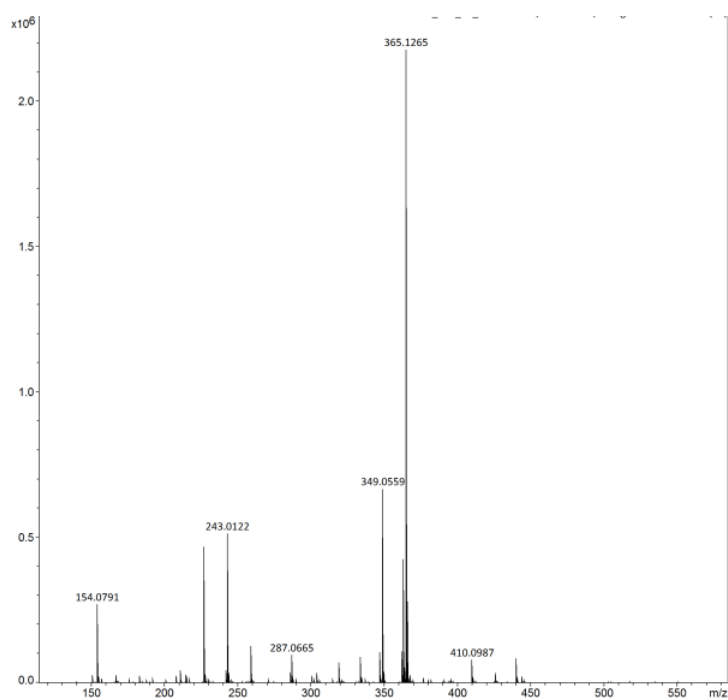

Fig.S6 Mass spectrum of complex 5

## S4 <sup>1</sup>H NMR and <sup>13</sup>C NMR Spectra of Hydrosilylation Products

### Diphenyl(1-phenylethyl)silane (**2a**)<sup>1</sup>

<sup>1</sup>H NMR (300 MHz, CDCl<sub>3</sub>): δ (ppm) 7.45-7.43 (m, 2H), 7.42-7.35 (m, 2H), 7.31-7.21 (m, 5H), 7.18-7.15 (m, 2H), 7.00-6.98 (m, 3H), 6.88-6.78 (m, 1H), 4.74 (d, J = 6.0 Hz, 1H), 2.72 (qd, J = 9.0, 3.0 Hz, 1H), 1.36 (d, J = 6.0 Hz, 3H). <sup>13</sup>C NMR (75 MHz, CDCl<sub>3</sub>): δ (ppm) 146.62, 135.67, 135.52, 133.97, 132.47, 129.93, 129.30, 128.04, 127.70, 125.90, 125.05, 27.02, 16.24.

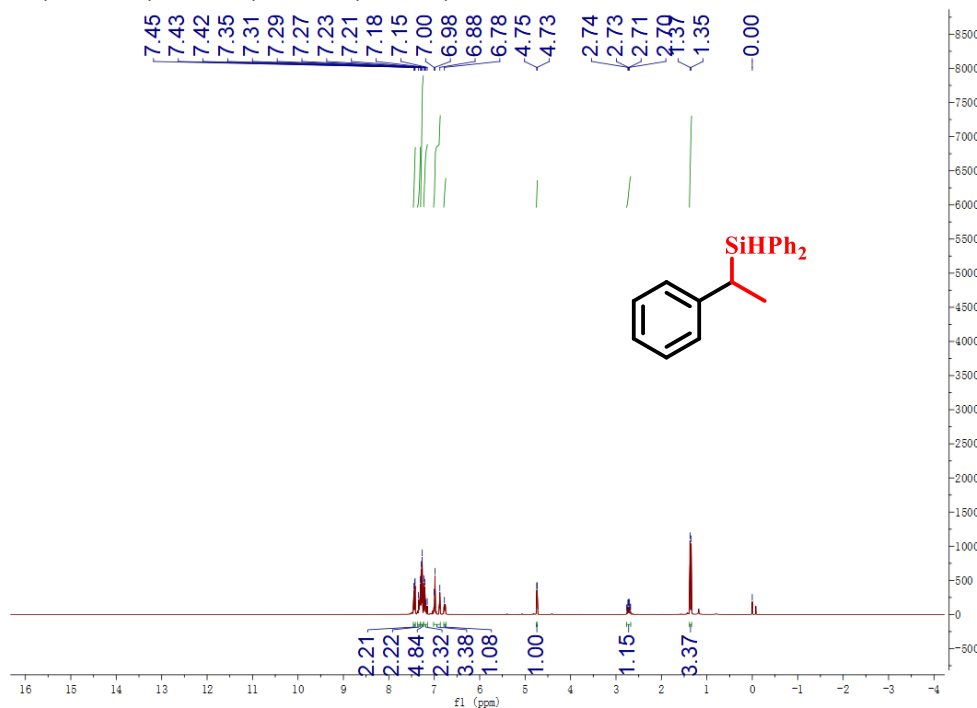

Fig.S7 <sup>1</sup>H NMR spectrum of **2a**

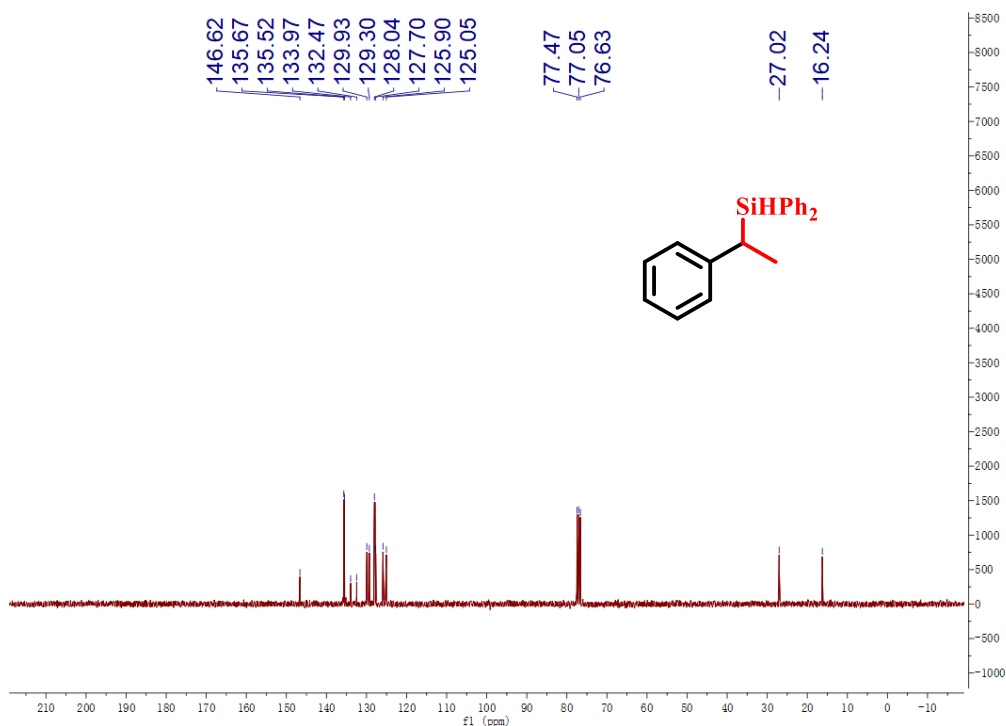

Fig.S8 <sup>13</sup>C NMR spectrum of **2a**

### Diphenyl(1-(p-tolyl)ethyl)silane (**2b**)<sup>1</sup>

<sup>1</sup>H NMR (300 MHz, CDCl<sub>3</sub>): δ (ppm) 7.44-7.42 (m, 2H), 7.29-7.23 (m, 4H), 7.21-7.18 (m, 2H), 7.16-7.13 (m, 2H), 6.91-6.88 (m, 2H), 6.82-6.80 (m, 2H), 4.74 (d, J = 3.0 Hz, 1H), 2.69 (qd, J = 6.0, 3.0 Hz, 1H), 2.18 (s, 3H), 1.35 (d, J = 9.0 Hz, 3H). <sup>13</sup>C NMR (75 MHz, CDCl<sub>3</sub>): δ (ppm) 141.29, 135.83, 135.69, 134.35, 133.32, 133.30, 129.76, 129.64, 129.00, 128.00, 127.83, 127.70, 26.47, 21.08, 16.83.

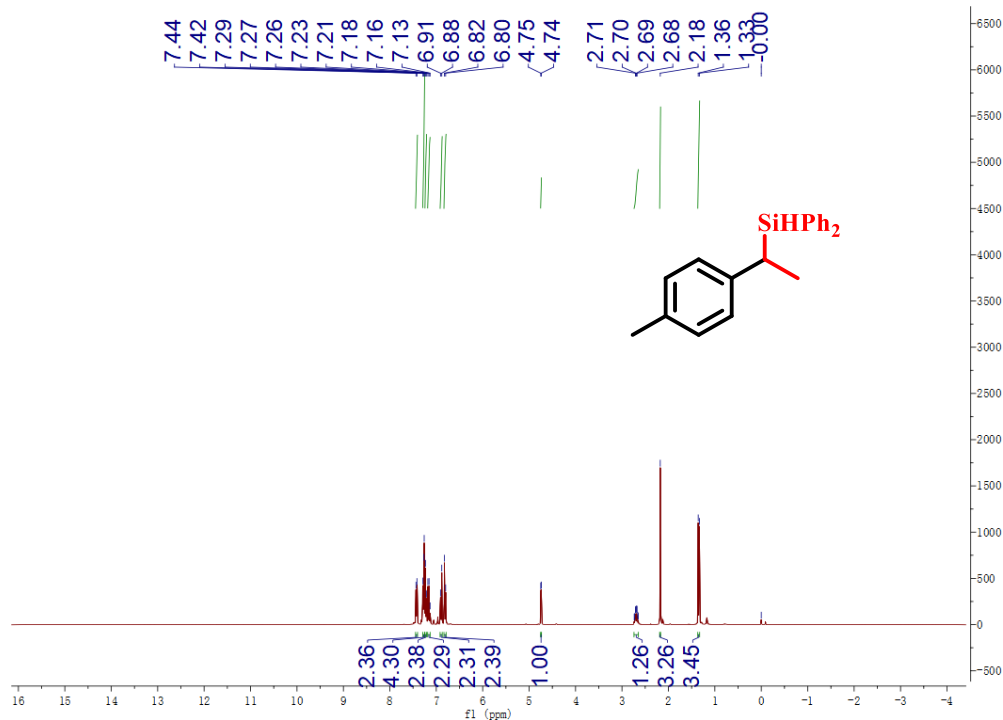

Fig.S9 <sup>1</sup>H NMR spectrum of **2b**

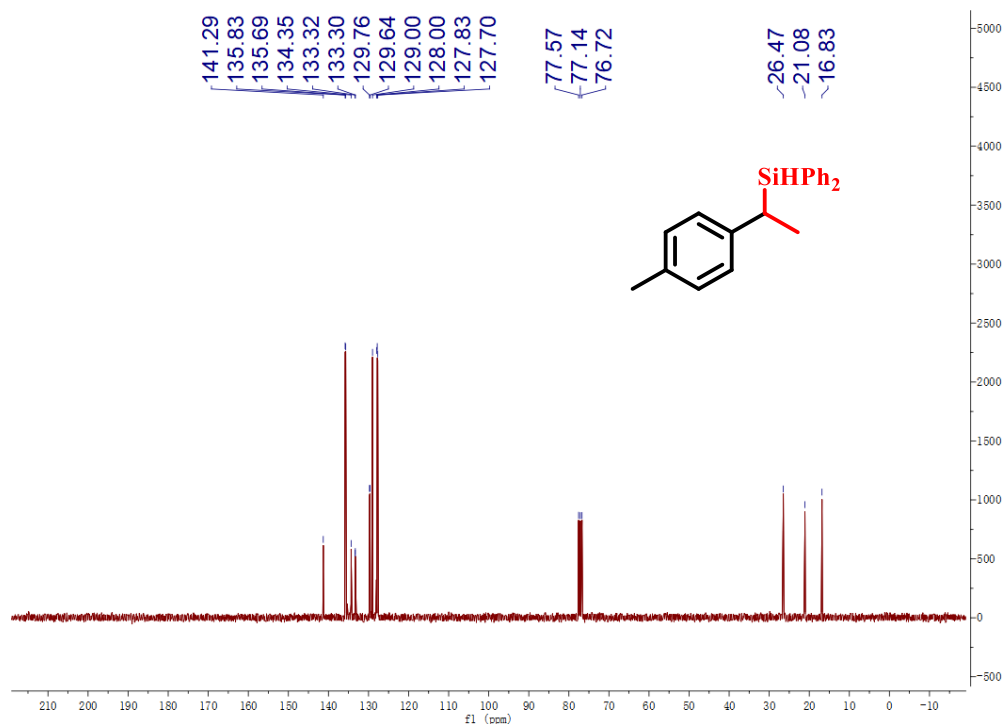

Fig.S10 <sup>13</sup>C NMR spectrum of **2b**

### Diphenyl(1-(*m*-tolyl)ethyl)silane (**2c**)<sup>1</sup>

<sup>1</sup>H NMR (300 MHz, CDCl<sub>3</sub>): δ (ppm) 7.41-7.38 (m, 1H), 7.24-7.08 (m, 7H), 7.13-7.10 (m, 2H), 7.08-7.6.94 (m, 1H), 6.91-6.75 (m, 1H), 6.71-6.66 (m, 2H), 4.73 (d, J = 3.0 Hz, 1H), 2.66 (qd, J = 6.0, 3.0 Hz, 1H), 2.08 (s, 3H), 1.33 (d, J = 6.0 Hz, 3H). <sup>13</sup>C NMR (75 MHz, CDCl<sub>3</sub>): δ (ppm) 144.37, 137.72, 135.95, 135.82, 135.38, 133.36, 129.89, 129.76, 128.87, 127.90, 125.91, 124.94, 27.06, 21.63, 16.72.

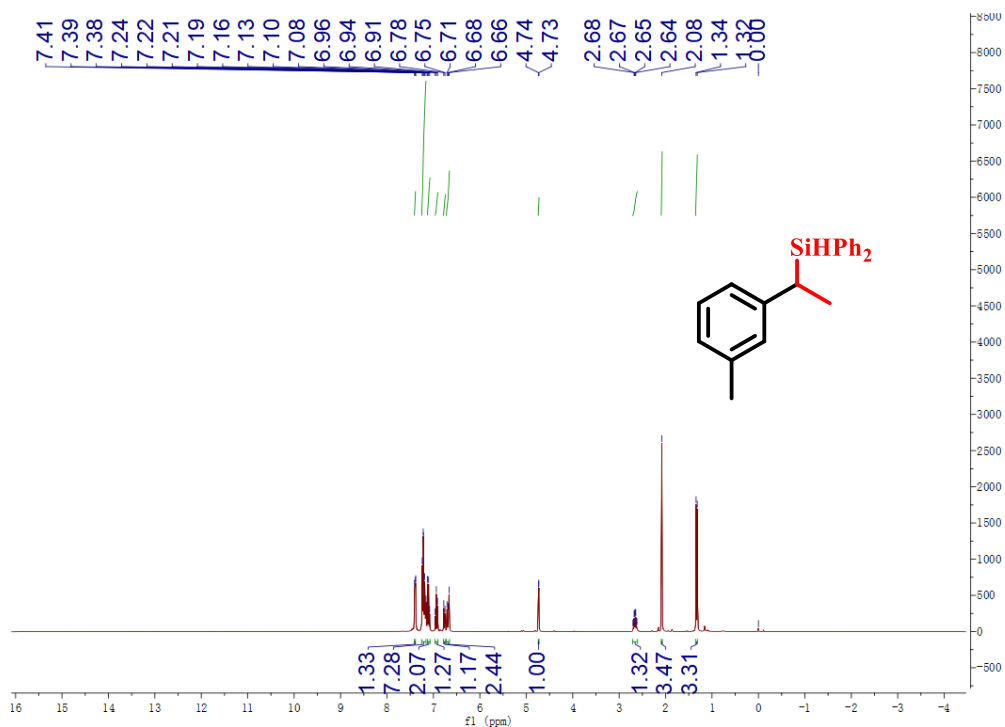

Fig.S11 <sup>1</sup>H NMR spectrum of **2c**

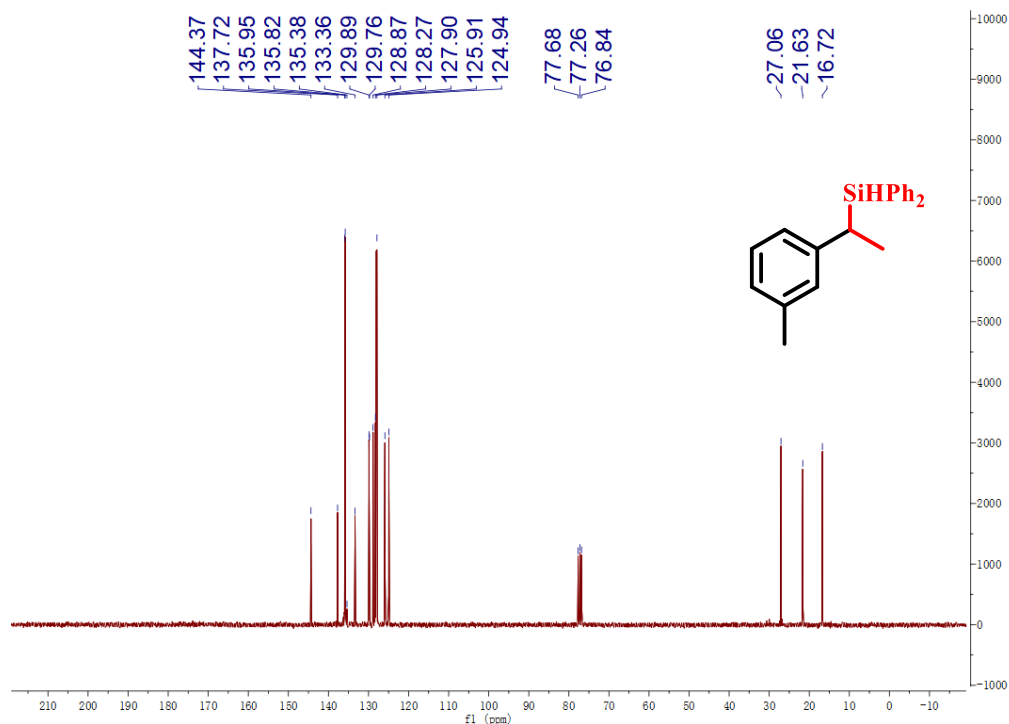

Fig.S12 <sup>13</sup>C NMR spectrum of **2c**



### Diphenyl(1-(*o*-tolyl)ethyl)silane (**2d**)<sup>2</sup>

<sup>1</sup>H NMR (300 MHz, CDCl<sub>3</sub>): δ (ppm) 7.46-7.44 (m, 2H), 7.35-7.32 (m, 2H), 7.31-7.28 (m, 2H), 7.25-7.20 (m, 3H), 7.17 (m, 1H), 7.15 (m, 1H), 7.01-6.94 (m, 3H), 4.72 (d, J = 6.0 Hz, 1H), 2.92 (qd, J = 9.0, 3.0 Hz, 1H), 1.99 (s, 3H), 1.36 (d, J = 6.0 Hz, 3H). <sup>13</sup>C NMR (75 MHz, CDCl<sub>3</sub>): δ (ppm) 142.87, 135.86, 135.33, 133.38, 132.86, 130.10, 129.80, 129.57, 127.97, 127.73, 126.81, 126.08, 124.77, 29.76, 20.13, 16.62.

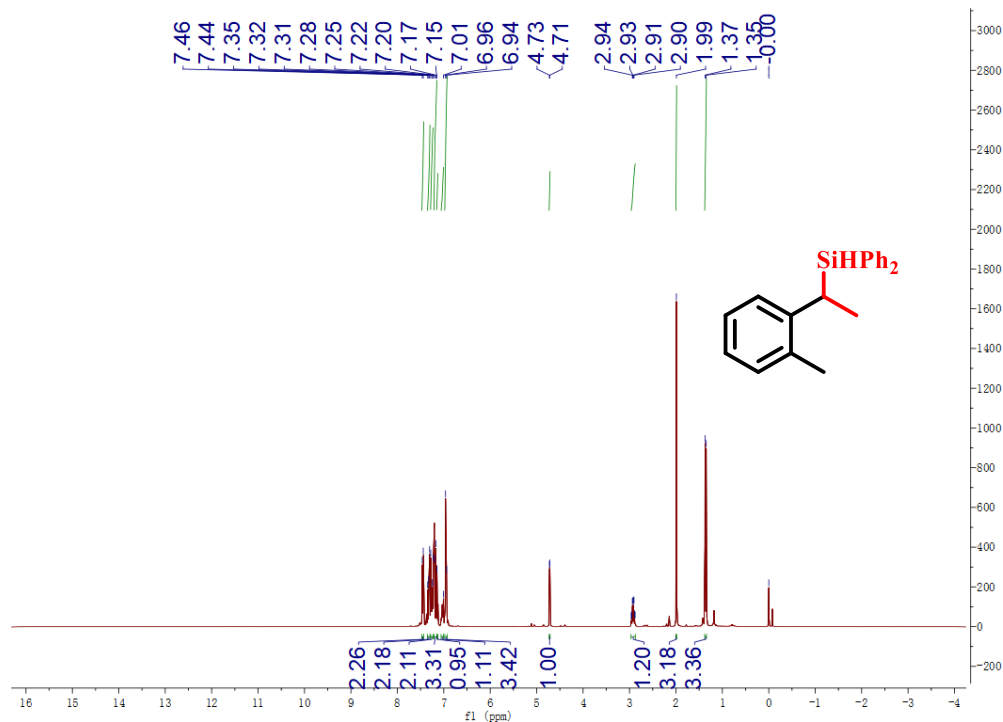

Fig.S13 <sup>1</sup>H NMR spectrum of **2d**

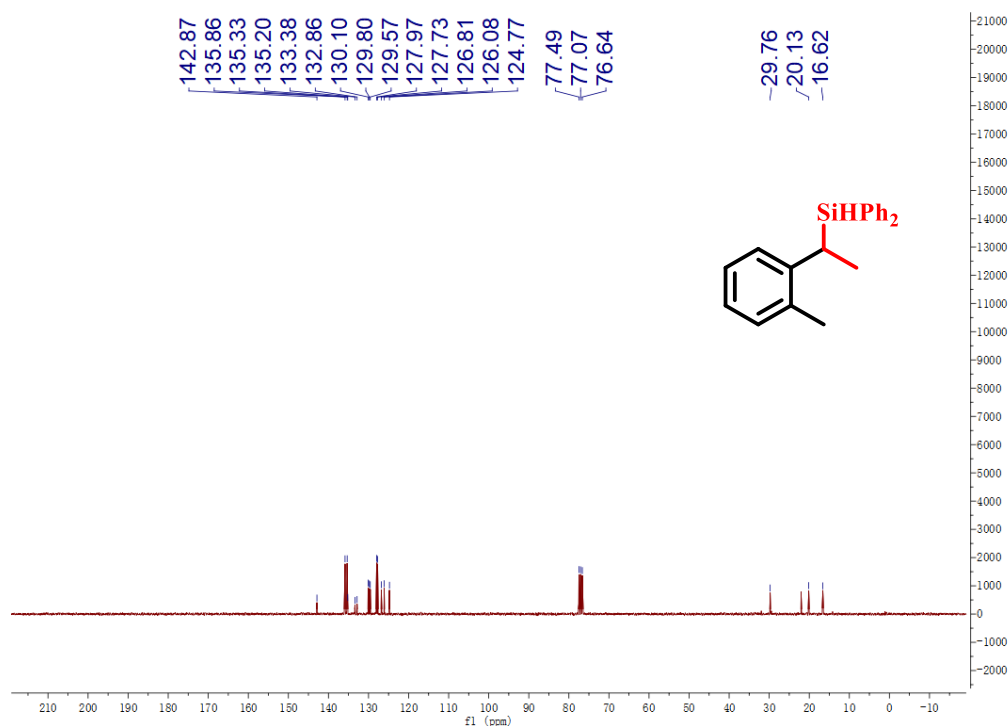

Fig.S14 <sup>13</sup>C NMR spectrum of **2d**

**(1-(4-methoxyphenyl)ethyl)diphenylsilane (2e)<sup>1</sup>**

<sup>1</sup>H NMR (300 MHz, CDCl<sub>3</sub>): δ (ppm) 7.45-7.43 (m, 2H), 7.43-7.17 (m, 8H), 6.86-6.83 (m, 2H), 6.68-6.65 (m, 2H), 4.75 (d, J = 3.0 Hz, 1H), 3.69 (s, 3H), 2.70 (qd, J = 6.0, 3.0 Hz, 1H), 1.36 (d, J = 9.0 Hz, 3H). <sup>13</sup>C NMR (75 MHz, CDCl<sub>3</sub>): δ (ppm) 157.13, 136.32, 135.71, 135.59, 133.24, 129.66, 129.53, 128.55, 127.91, 127.73, 113.66, 55.24, 25.82, 16.87.

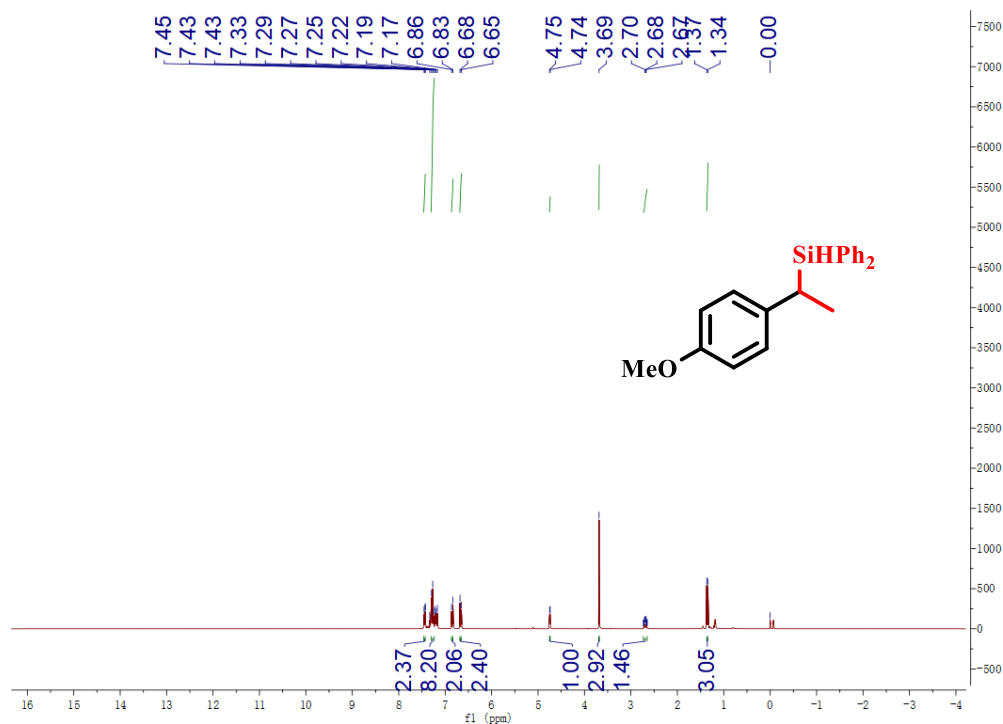

Fig.S15 <sup>1</sup>H NMR spectrum of 2e

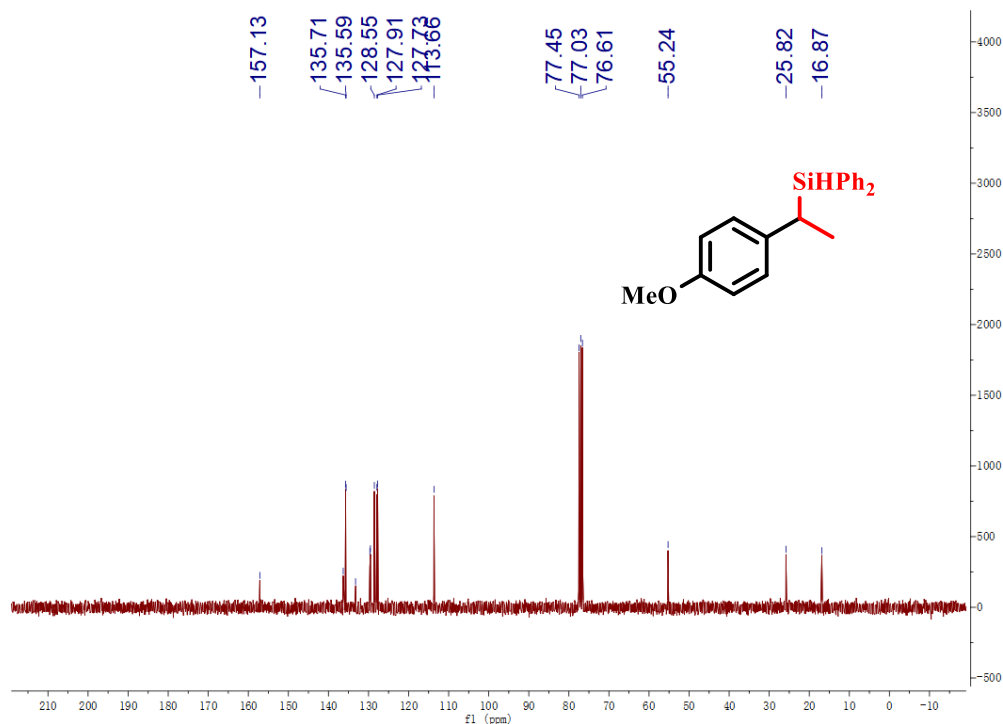

Fig.S16 <sup>13</sup>C NMR spectrum of 2e

**(1-(4-(tert-butyl)phenyl)ethyl)diphenylsilane (2f)<sup>1</sup>**

<sup>1</sup>H NMR (300 MHz, CDCl<sub>3</sub>): δ (ppm) 7.42-7.39 (m, 2H), 7.27-7.25 (m, 2H), 7.23-7.21 (m, 2H), 7.19-7.18 (m, 2H), 7.13-7.08 (m, 4H), 6.86-6.83 (m, 2H), 4.74 (d, J = 6.0 Hz, 1H), 2.69 (qd, J = 6.0, 3.0 Hz, 1H), 1.34 (d, J = 6.0 Hz, 3H), 1.22 (s, 9H). <sup>13</sup>C NMR (75 MHz, CDCl<sub>3</sub>): δ (ppm) 147.84, 141.25, 135.90, 135.74, 133.41, 133.36, 129.81, 129.64, 128.05, 127.82, 127.47, 125.19, 34.42, 31.62, 26.41, 16.68.

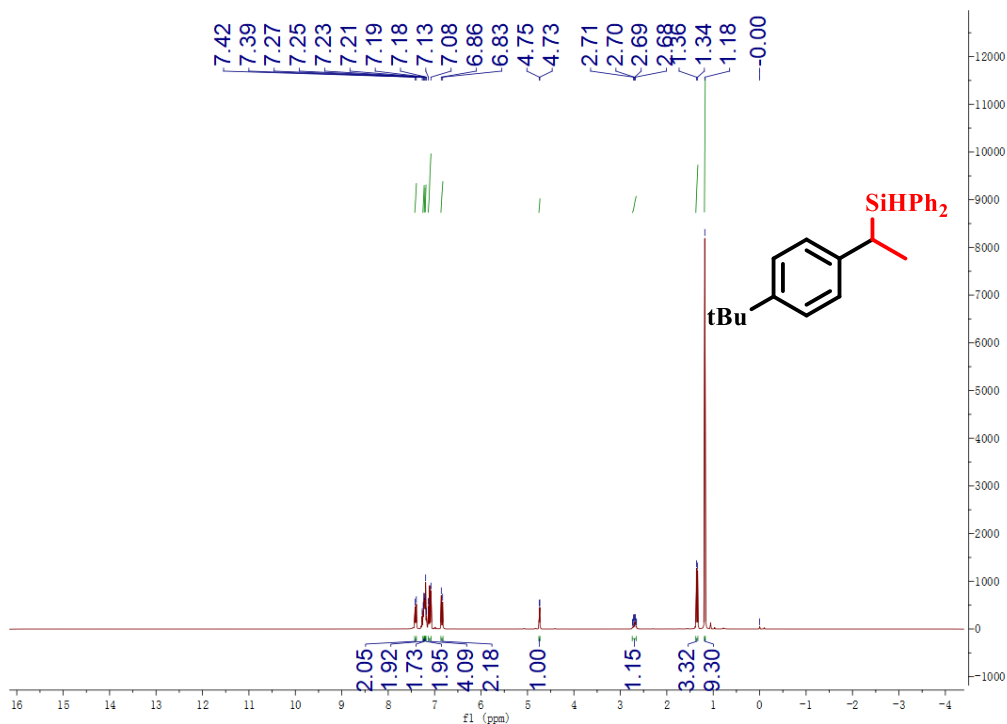

Fig.S17<sup>1</sup>H NMR spectrum of **2f**

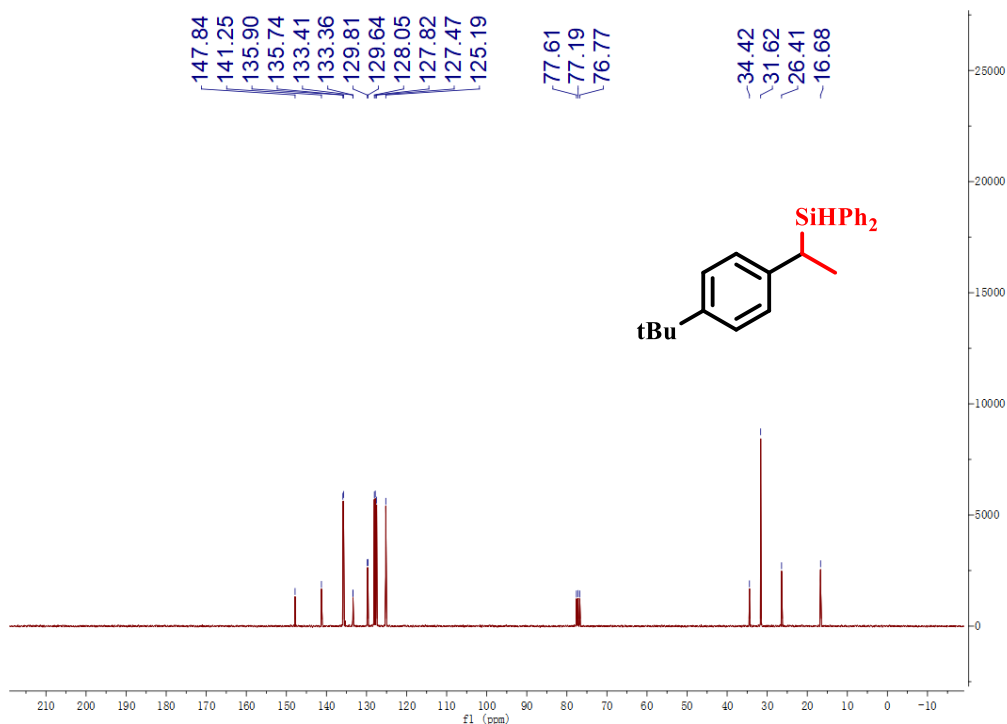

Fig.S18<sup>13</sup>C NMR spectrum of **2f**

**(1-(naphthalen-1-yl)ethyl)diphenylsilane (2i)<sup>1</sup>**

<sup>1</sup>H NMR (300 MHz, CDCl<sub>3</sub>): δ (ppm) 7.53-7.50 (m, 1H), 7.46-7.42 (m, 2H), 7.40-7.31 (m, 2H), 7.27-7.18 (m, 6H), 7.18-7.11 (m, 3H), 7.09-7.05 (m, 2H), 7.02 (m, 1H), 4.80 (d, J = 3.0 Hz, 1H), 2.87 (qd, J = 6.0, 3.0 Hz, 1H), 1.44 (d, J = 6.0 Hz, 3H). <sup>13</sup>C NMR (75 MHz, CDCl<sub>3</sub>): δ (ppm) 141.01, 135.97, 135.38, 133.90, 133.23, 132.80, 131.45, 129.76, 129.62, 128.83, 127.87, 127.81, 125.55, 125.53, 125.34, 125.25, 124.09, 123.59, 21.19, 17.14.

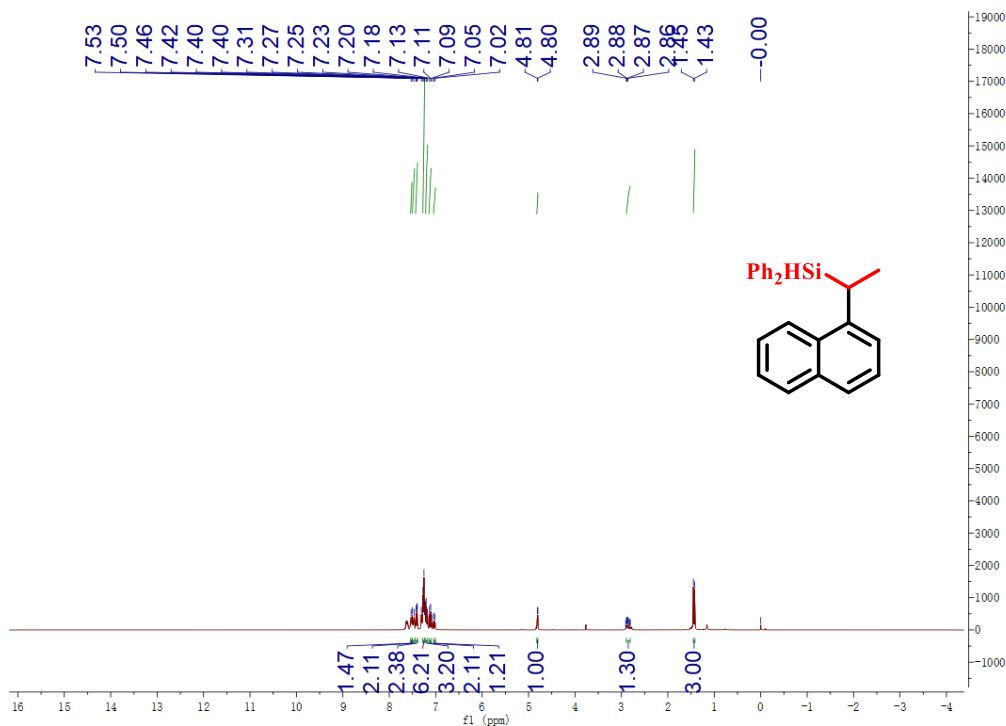

Fig.S19 <sup>1</sup>H NMR spectrum of 2i

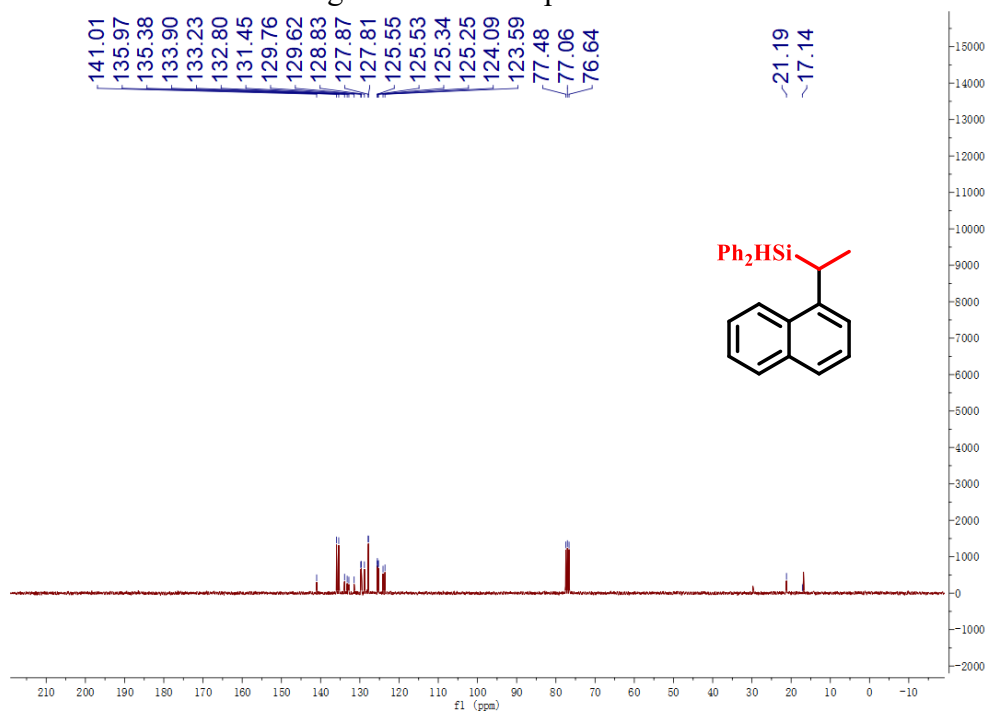

Fig.S20 <sup>13</sup>C NMR spectrum of 2i

**(1-(naphthalen-2-yl)ethyl)diphenylsilane (2j)<sup>1</sup>**

<sup>1</sup>H NMR (300 MHz, CDCl<sub>3</sub>): δ (ppm) 7.59-7.52 (m, 1H), 7.49-7.45 (m, 2H), 7.41-7.38 (m, 2H), 7.30-7.26 (m, 2H), 7.24-7.19 (m, 4H), 7.16-7.12 (m, 3H), 7.10-7.07 (m, 2H), 7.03-7.01 (m, 1H), 4.79 (d, J = 3.0 Hz, 1H), 2.86 (qd, J = 6.0, 3.0 Hz, 1H), 1.42 (d, J = 9.0 Hz, 3H). <sup>13</sup>C NMR (75 MHz, CDCl<sub>3</sub>): δ (ppm) 142.38, 136.07, 135.93, 135.52, 134.02, 133.23, 131.89, 130.09, 129.98, 128.42, 128.27, 128.11, 127.88, 127.67, 127.59, 126.08, 125.61, 125.09, 27.55, 16.92.

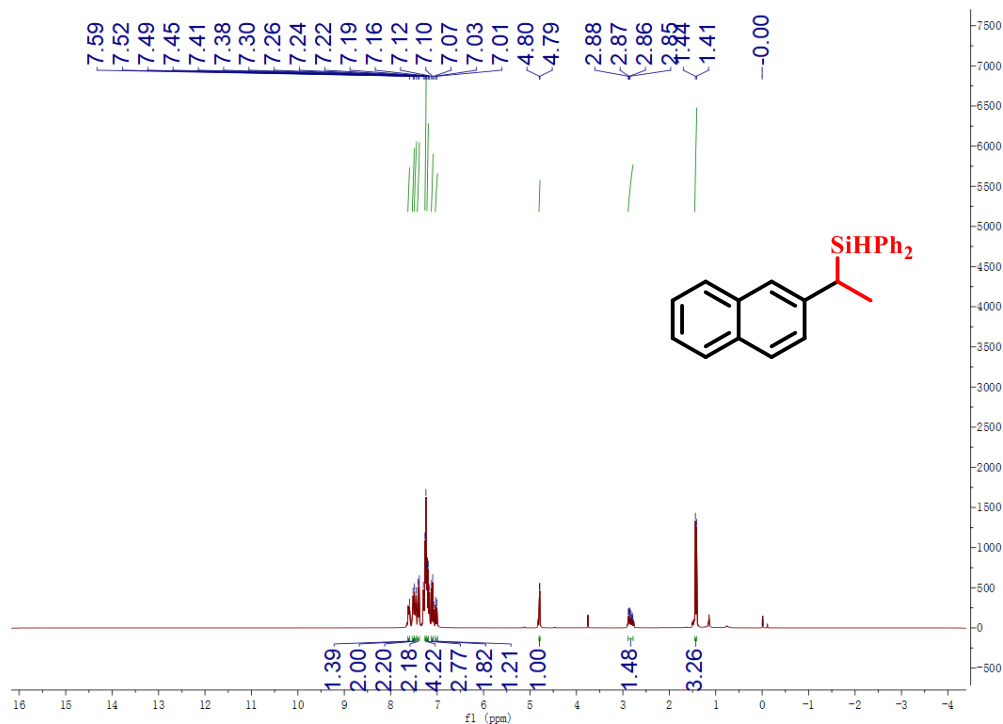

Fig.S21 <sup>1</sup>H NMR spectrum of 2j

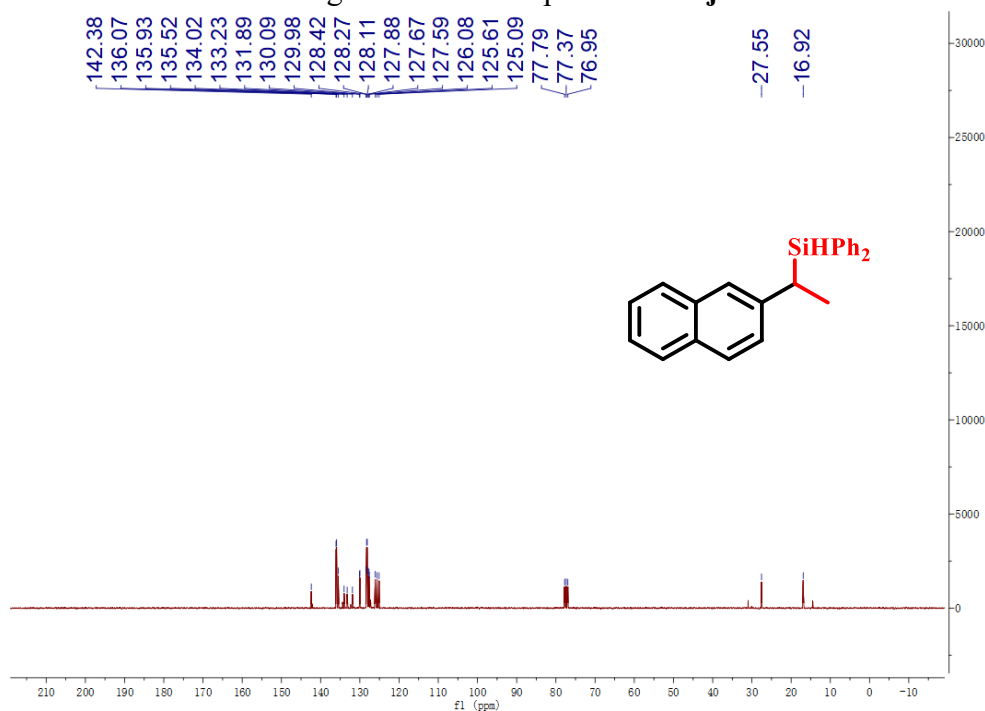

Fig.S22 <sup>13</sup>C NMR spectrum of 2j

**(1-(thiophen-2-yl) ethyl)diphenylsilane (2k)<sup>1</sup>**

<sup>1</sup>H NMR (300 MHz, CDCl<sub>3</sub>): δ (ppm) 7.47-7.45 (m, 2H), 7.35-7.30 (m, 3H), 7.27-7.22 (m, 3H), 6.78-6.77 (m, 2H), 6.75 (m, 1H), 6.51 (m, 1H), 6.49 (m, 1H), 4.83 (d, J = 6.0 Hz, 1H), 3.04 (qd, J = 6.0, 3.0 Hz, 1H), 1.42 (d, J = 6.0 Hz, 3H). <sup>13</sup>C NMR (75 MHz, CDCl<sub>3</sub>): δ (ppm) 148.17, 135.70, 135.60, 132.74, 132.63, 129.89, 129.82, 128.02, 127.88, 126.75, 122.84, 121.83, 22.29, 18.09.

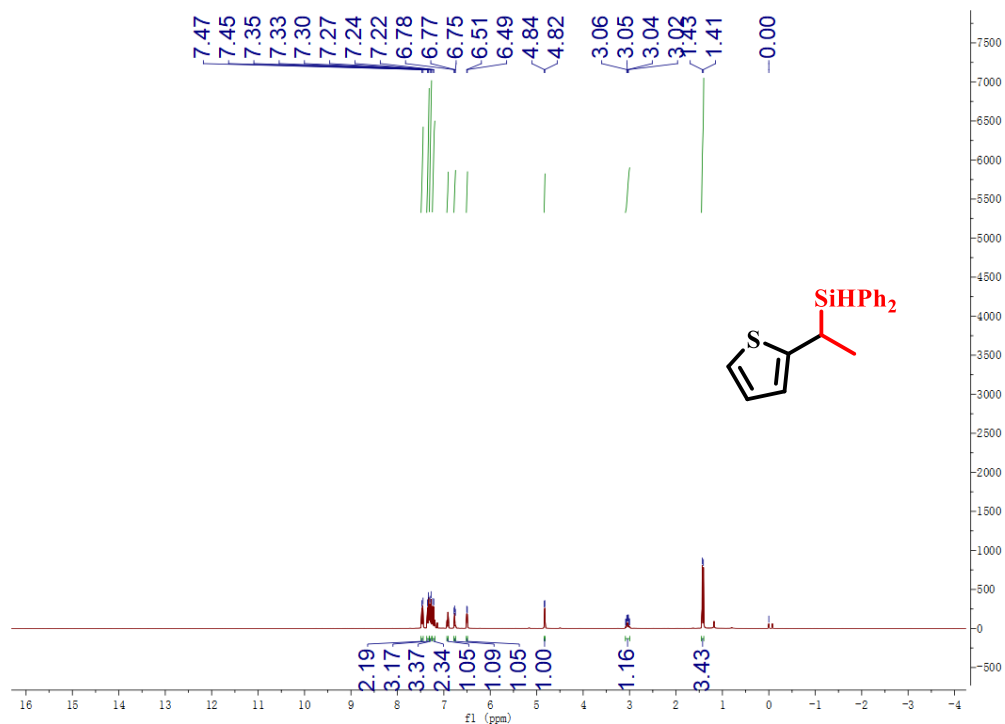

Fig.S23 <sup>1</sup>H NMR spectrum of 2k

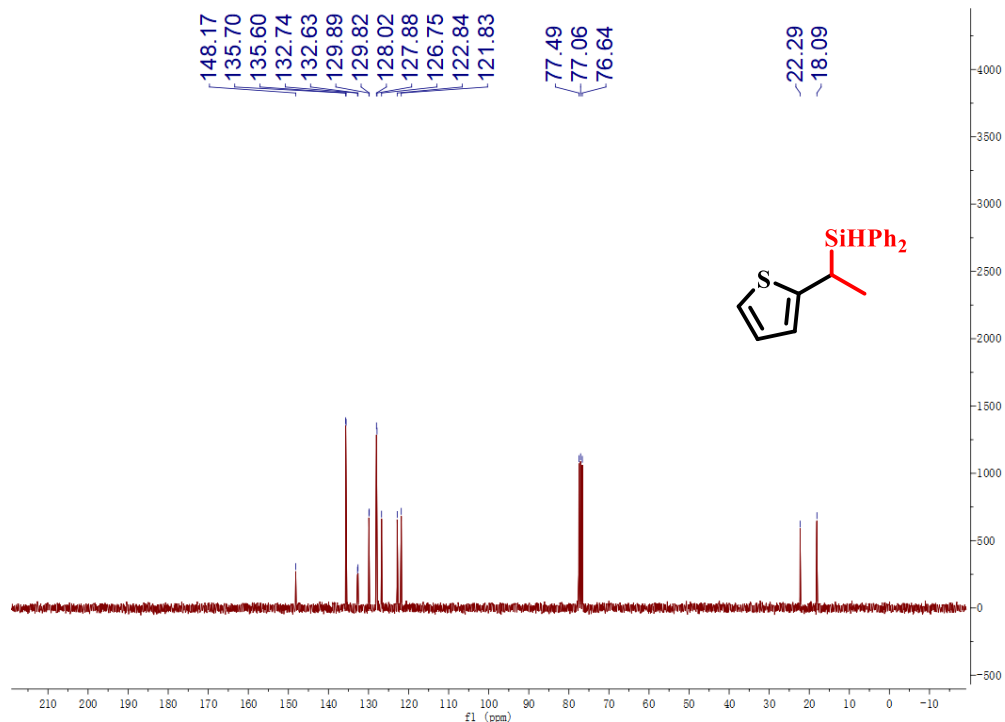

Fig.S24 <sup>13</sup>C NMR spectrum of 2k

**(1-([1,1'-biphenyl]-4-yl)ethyl)diphenylsilane(2I)<sup>1</sup>**

<sup>1</sup>H NMR (300 MHz, CDCl<sub>3</sub>): δ (ppm) 7.45-7.43 (m, 4H), 7.41 (m, 1H), 7.32-7.29(m, 3H), 7.28-7.24 (m, 5H), 7.21 (m, 1H), 7.18 (m, 1H), 7.15-6.13 (m, 2H), 6.96-6.93 (m, 2H), 6.93 (m, 1H), 4.75 (d, J = 3.0 Hz, 1H), 2.75 (qd, J = 9.0, 3.0 Hz, 1H), 1.37 (d, J = 9.0 Hz, 3H). <sup>13</sup>C NMR (75 MHz, CDCl<sub>3</sub>): δ (ppm) 143.75, 141.25, 137.89, 135.93, 135.79, 133.14, 129.96, 129.84, 128.89, 128.30, 128.15, 127.98, 127.03, 127.00, 26.91, 16.68.

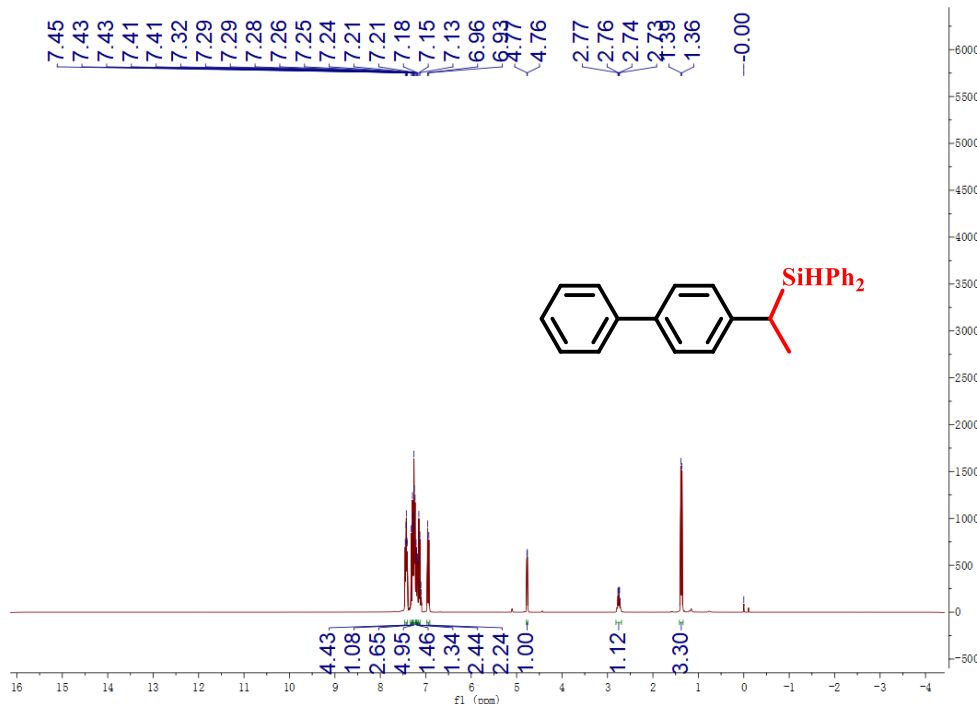

Fig.S25 <sup>1</sup>H NMR spectrum of 2I

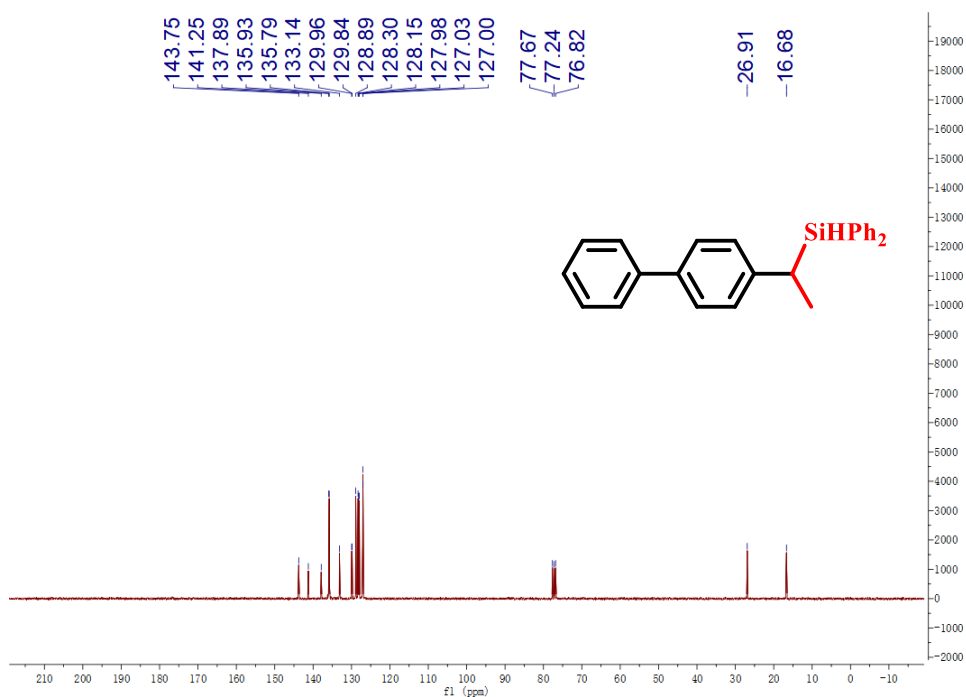

Fig.S26 <sup>13</sup>C NMR spectrum of 2I

**(1-(3-chlorophenyl)ethyl)diphenylsilane (2m)<sup>3</sup>**

<sup>1</sup>H NMR (300 MHz, CDCl<sub>3</sub>): δ (ppm) 7.45-7.43 (m, 2H), 7.35 (m, 1H), 7.32-7.21 (m, 6H), 7.18-7.15 (m, 2H), 7.00-6.98 (m, 2H), 6.88 (m, 1H), 4.74 (d, J = 6.0 Hz, 1H), 2.72 (qd, J = 9.0, 3.0 Hz, 1H), 1.36 (d, J = 6.0 Hz, 3H). <sup>13</sup>C NMR (75 MHz, CDCl<sub>3</sub>): δ (ppm) 146.62, 135.67, 135.52, 133.97, 132.47, 129.93, 129.82, 129.30, 128.04, 127.87, 127.70, 125.90, 125.05, 27.02, 16.24.

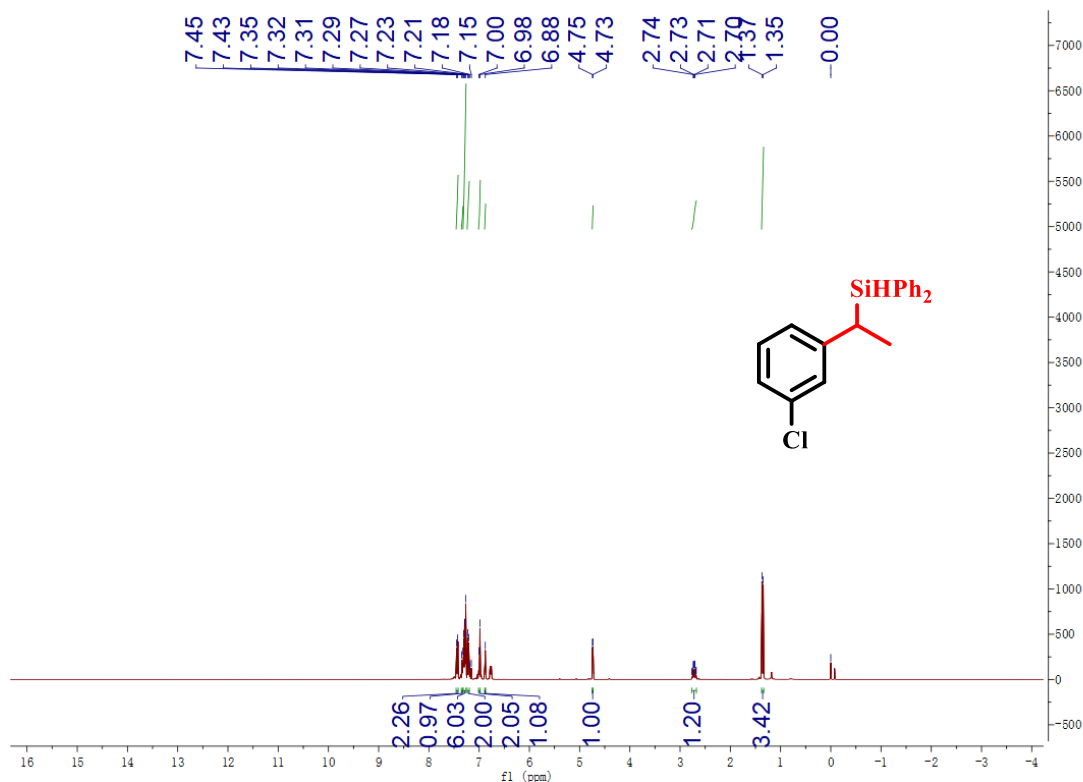

Fig.S27 <sup>1</sup>H NMR spectrum of **2m**

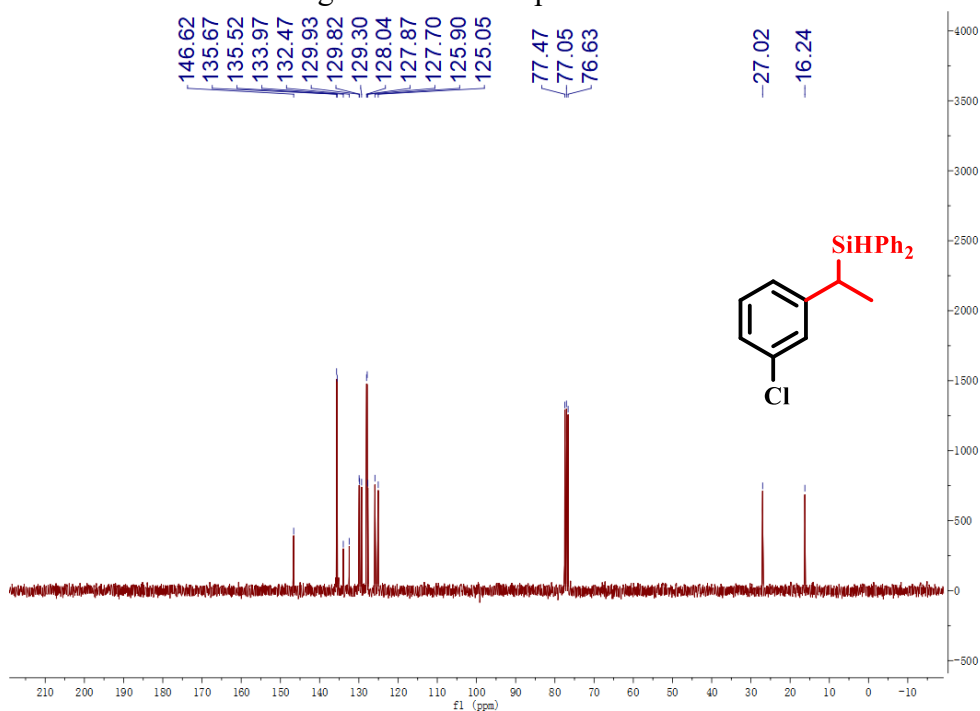

Fig.S28 <sup>13</sup>C NMR spectrum of **2m**



**(1-(2-chlorophenyl)ethyl)diphenylsilane (2n)<sup>3</sup>**

<sup>1</sup>H NMR (300 MHz, CDCl<sub>3</sub>): δ (ppm) 7.55-7.53 (m, 2H), 7.42-7.29 (m, 7H), 7.26-7.13 (m, 3H), 7.10-7.05 (m, 2H), 4.83 (d, J = 3.0 Hz, 1H), 3.45 (qd, J = 6.0, 3.0 Hz, 1H), 1.43 (d, J = 9.0 Hz, 3H). <sup>13</sup>C NMR (75 MHz, CDCl<sub>3</sub>): δ (ppm) 142.39, 135.88, 135.32, 135.18, 132.43, 129.87, 129.65, 129.32, 128.24, 128.07, 127.96, 127.77, 126.75, 125.97, 22.79, 16.07.

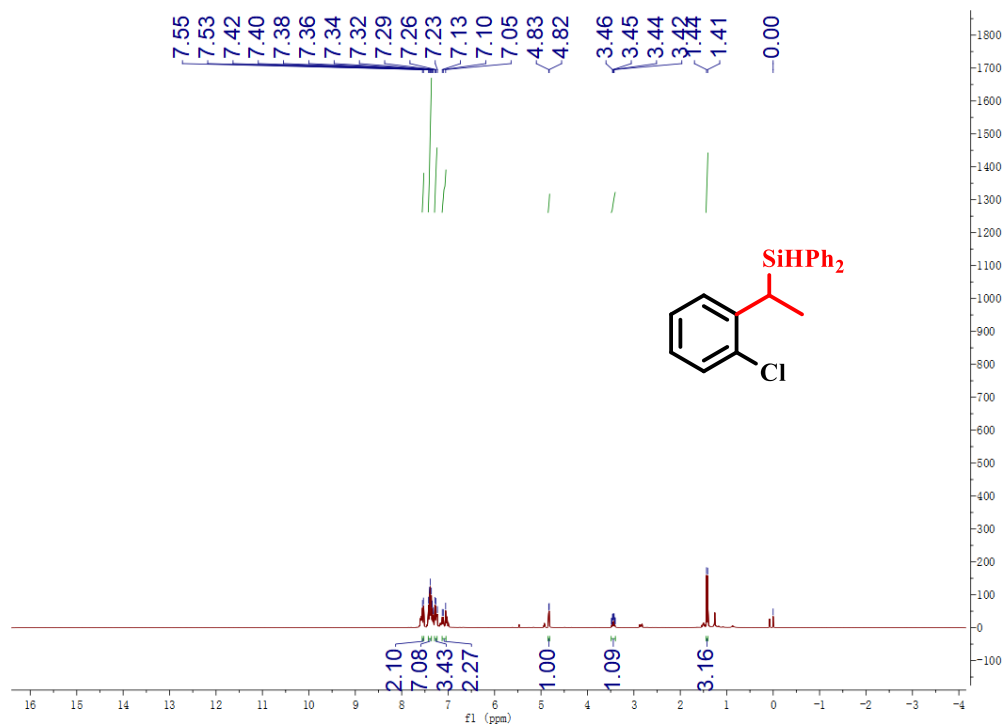

Fig.S29 <sup>1</sup>H NMR spectrum of **2n**

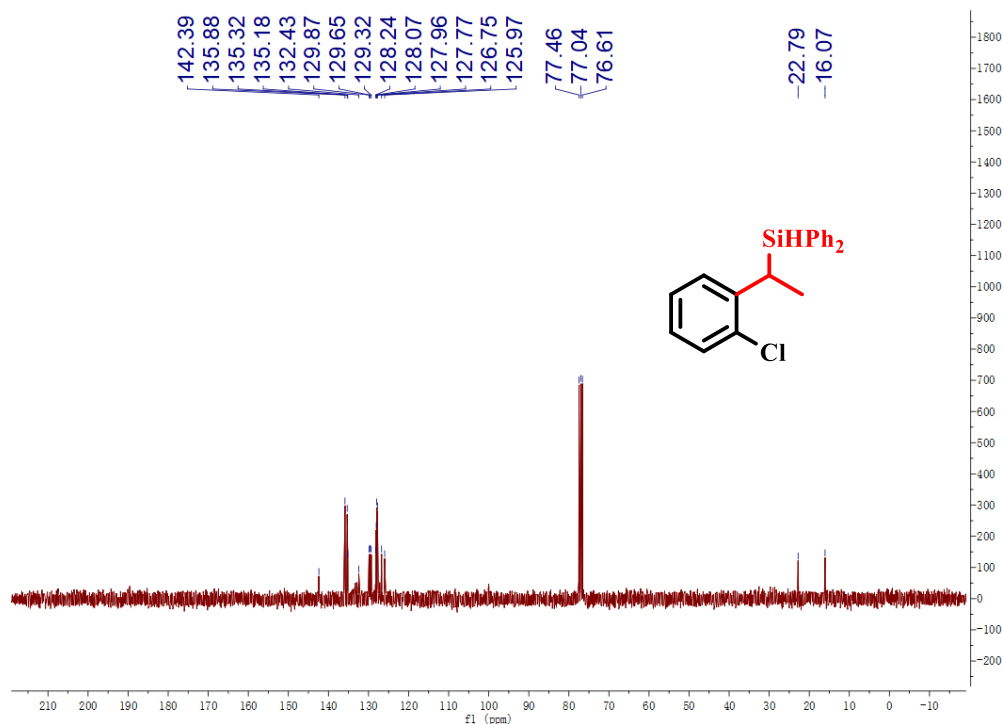

Fig.S30 <sup>13</sup>C NMR spectrum of **2n**

**(1-(4-chlorophenyl)ethyl)diphenylsilane (2o)<sup>3</sup>**

<sup>1</sup>H NMR (300 MHz, CDCl<sub>3</sub>): δ (ppm) 7.42-7.40 (m, 2H), 7.31-7.20 (m, 6H), 7.17-7.15 (m, 2H), 7.09-7.02 (m, 2H), 6.99-6.79 (m, 2H), 4.72 (d, J = 6.0 Hz, 1H), 2.70 (qd, J = 9.0, 3.0 Hz, 1H), 1.33 (d, J = 9.0 Hz, 3H). <sup>13</sup>C NMR (75 MHz, CDCl<sub>3</sub>): δ (ppm) 135.68, 135.55, 135.16, 129.89, 129.79, 128.96, 128.23, 128.13, 128.03, 127.88, 26.58, 16.43.

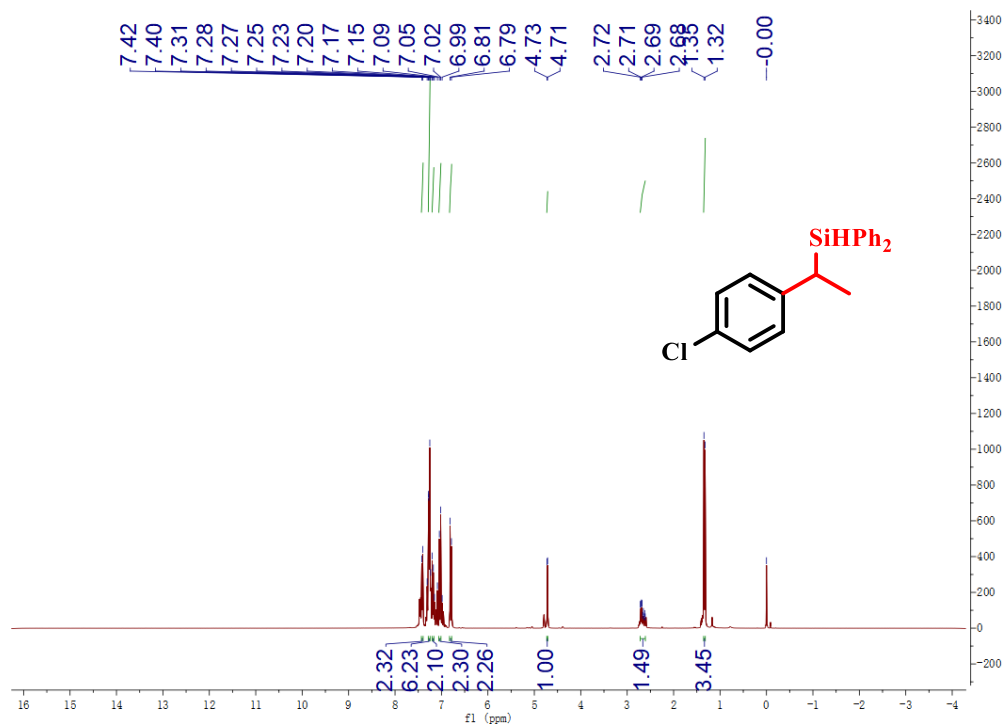

Fig.S31 <sup>1</sup>H NMR spectrum of 2o

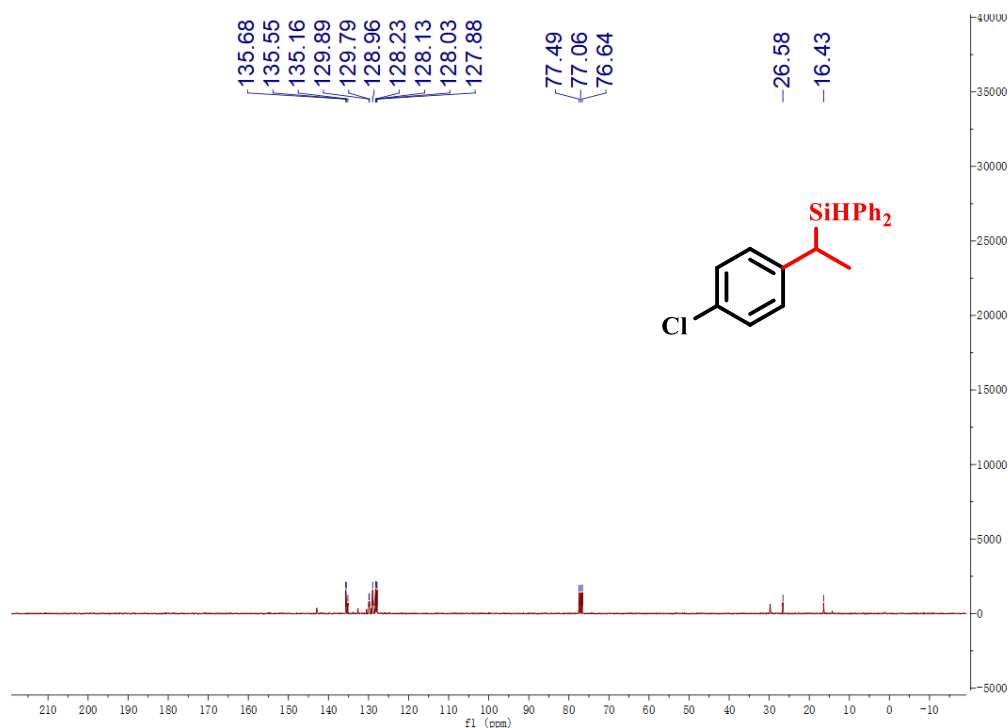

Fig.S32 <sup>13</sup>C NMR spectrum of 2o

**(1-(4-Bromophenyl)ethyl)diphenylsilane (2p)<sup>3</sup>**

<sup>1</sup>H NMR (300 MHz, CDCl<sub>3</sub>): δ (ppm) 7.68 (m, 1H), 7.68-7.66 (m, 2H), 7.65 (m, 1H), 7.53-7.47 (m, 6H), 7.46-7.44 (m, 2H), 7.13-7.11 (m, 2H), 5.00 (d, J = 3.0 Hz, 1H), 2.80 (qd, J = 9.0, 3.0 Hz, 1H), 1.58 (d, J = 6.0 Hz, 3H). <sup>13</sup>C NMR (75 MHz, CDCl<sub>3</sub>): δ (ppm) 143.29, 135.62, 135.22, 133.93, 131.44, 129.83, 129.75, 128.23, 128.20, 119.51, 30.03, 14.29.

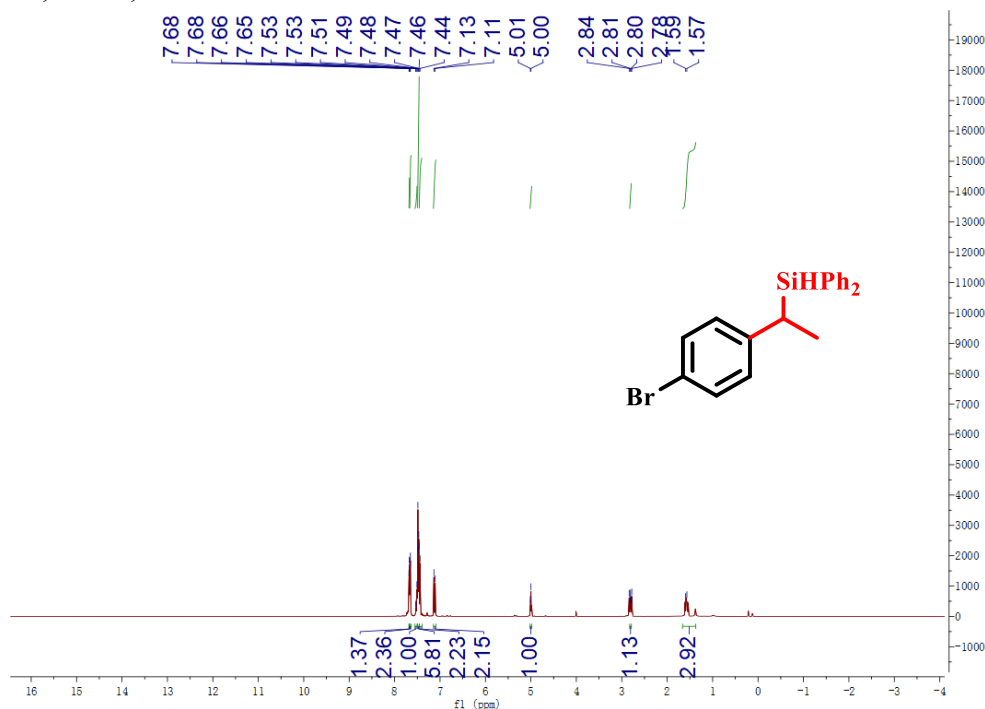

Fig.S33 <sup>1</sup>H NMR spectrum of 2p

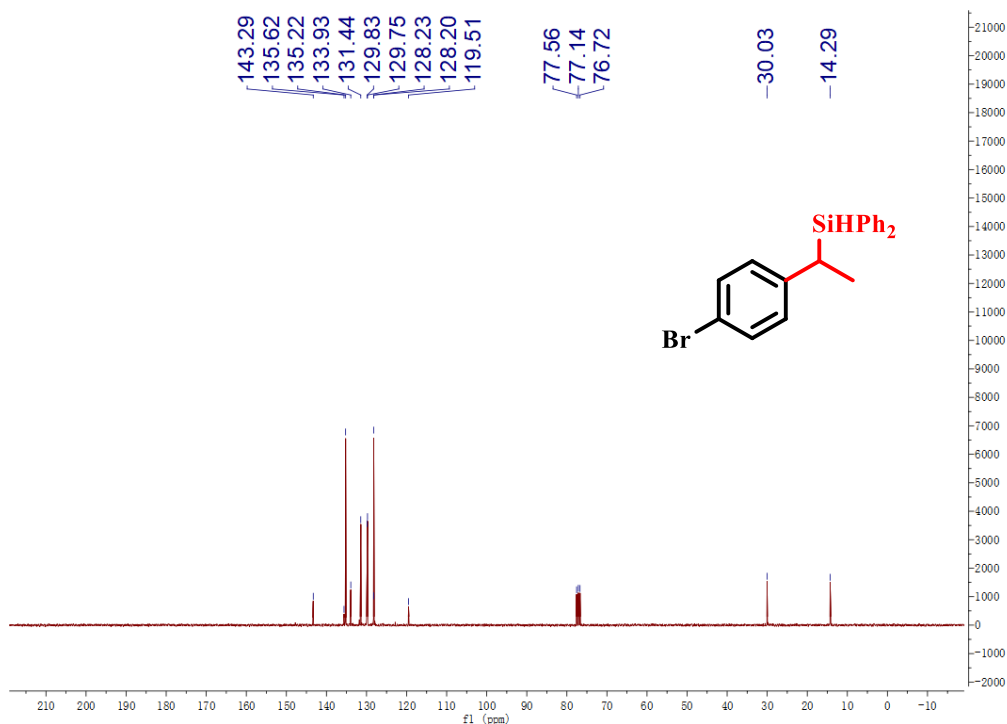

Fig.S34 <sup>13</sup>C NMR spectrum of 2p

**(1-(3-fluorophenyl)ethyl)diphenylsilane (2q)<sup>1</sup>**

<sup>1</sup>H NMR (300 MHz, CDCl<sub>3</sub>): δ (ppm) 7.39-7.37(m, 2H), 7.24-7.13 (m, 4H), 7.13-7.08 (m, 2H), 6.97-6.95 (m, 2H), 6.92-6.89 (m, 1H), 6.63-6.58(m, 3H), 4.71 (d, J = 3.0 Hz, 1H), 2.68 (qd, J = 6.0, 3.0 Hz, 1H), 1.30 (d, J = 6.0 Hz, 3H). <sup>13</sup>C NMR (75 MHz, CDCl<sub>3</sub>): δ (ppm) 164.60, 161.36, 135.75, 135.59, 132.64, 129.99, 129.87, 129.57, 129.45, 128.12, 127.94, 111.66, 27.18, 16.38.

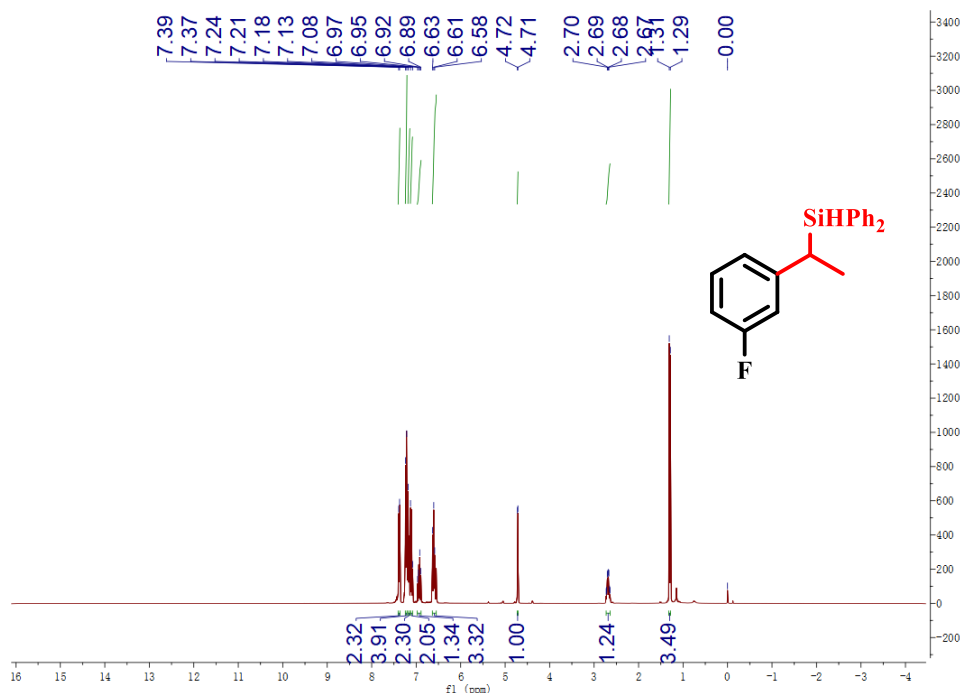

Fig.S35 <sup>1</sup>H NMR spectrum of **2q**

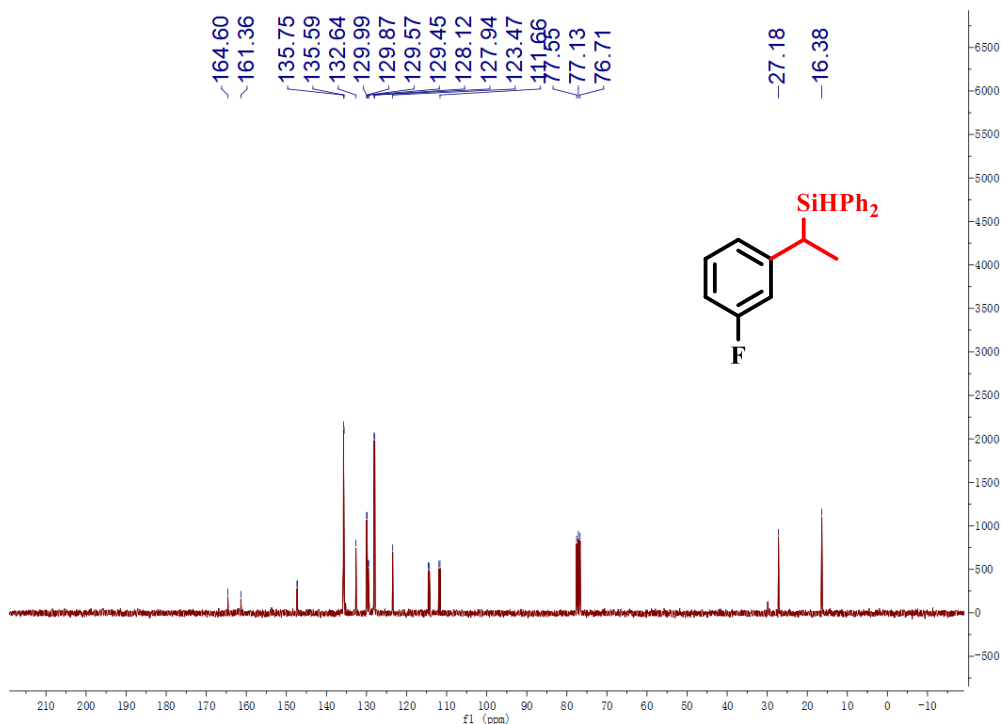

Fig.S36 <sup>13</sup>C NMR spectrum of **2q**

**(1-(4-fluorophenyl)ethyl)diphenylsilane (2r)<sup>1</sup>**

<sup>1</sup>H NMR (300 MHz, CDCl<sub>3</sub>): δ (ppm) 7.44-7.41 (m, 2H), 7.29-7.25 (m, 3H), 7.23-7.17(m, 3H), 6.85-6.82 (m, 2H) 6.81-6.76 (m, 3H), 6.73 (m, 1H), 4.72 (d, J = 3.0 Hz, 1H), 2.70 (qd, J = 6.0, 3.0 Hz , 1H), 1.34 (d, J = 6.0 Hz, 3H). <sup>13</sup>C NMR (75 MHz, CDCl<sub>3</sub>): δ (ppm) 139.98, 135.67, 135.53, 132.79, 129.83, 129.70, 128.90, 128.80, 128.00, 127.82, 115.03, 114.75, 26.22, 16.70.

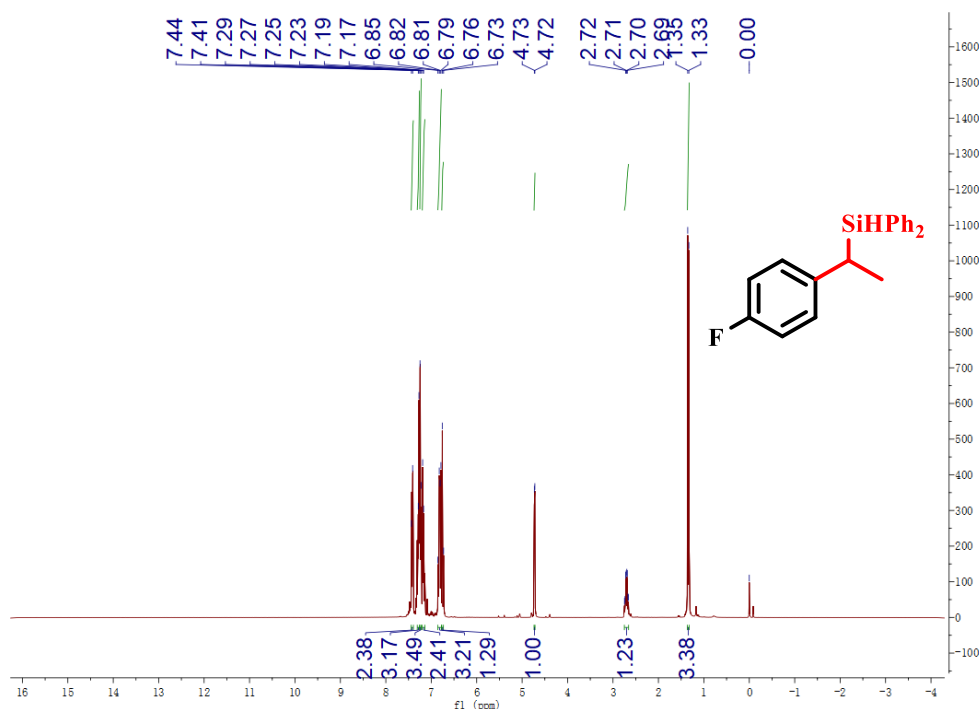

Fig.S37 <sup>1</sup>H NMR spectrum of 2r

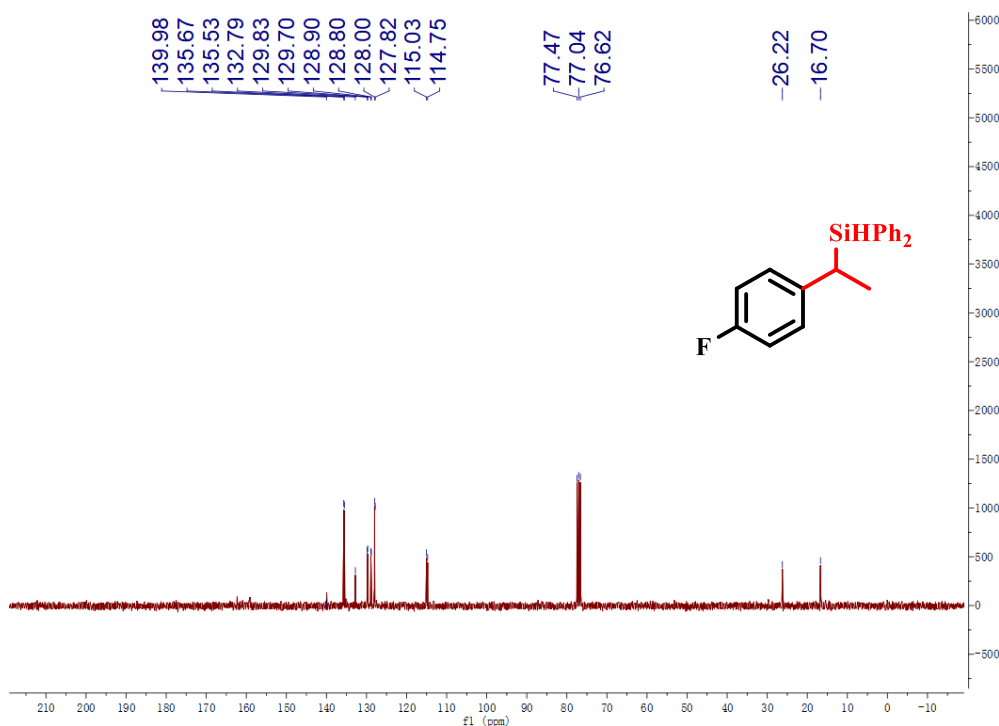

Fig.S38 <sup>13</sup>C NMR spectrum of 2r

### Diphenyl(1-(3-(trifluoromethyl)phenyl)ethyl)silane (**2s**)<sup>3</sup>

<sup>1</sup>H NMR (300 MHz, CDCl<sub>3</sub>): δ (ppm) 7.36-7.38 (m, 2H), 7.25-7.17 (m, 7H), 7.13-7.04 (m, 3H), 7.00-6.98(m, 2H), 4.70 (d, J = 3.0 Hz, 1H), 2.74 (qd, J = 6.0, 3.0 Hz, 1H), 1.33 (d, J = 9.0 Hz, 3H). <sup>13</sup>C NMR (75 MHz, CDCl<sub>3</sub>): δ (ppm) 145.63, 135.86, 135.72, 132.44, 131.11, 130.24, 130.12, 128.69, 128.31, 128.15, 124.61, 121.94, 27.54, 16.24.

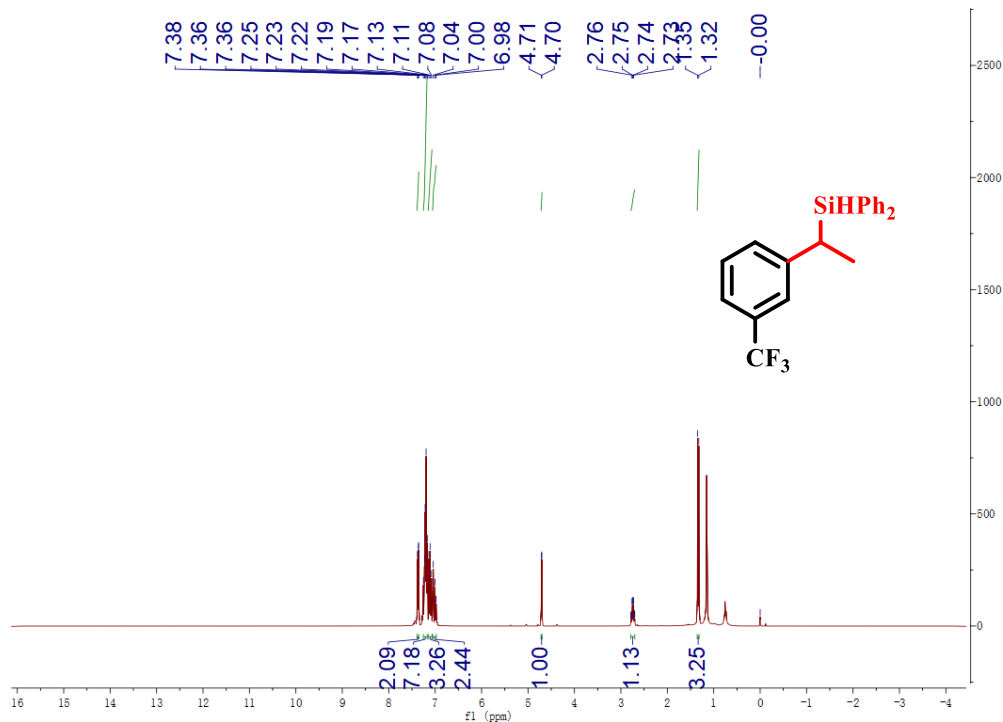

Fig.S39 <sup>1</sup>H NMR spectrum of **2s**

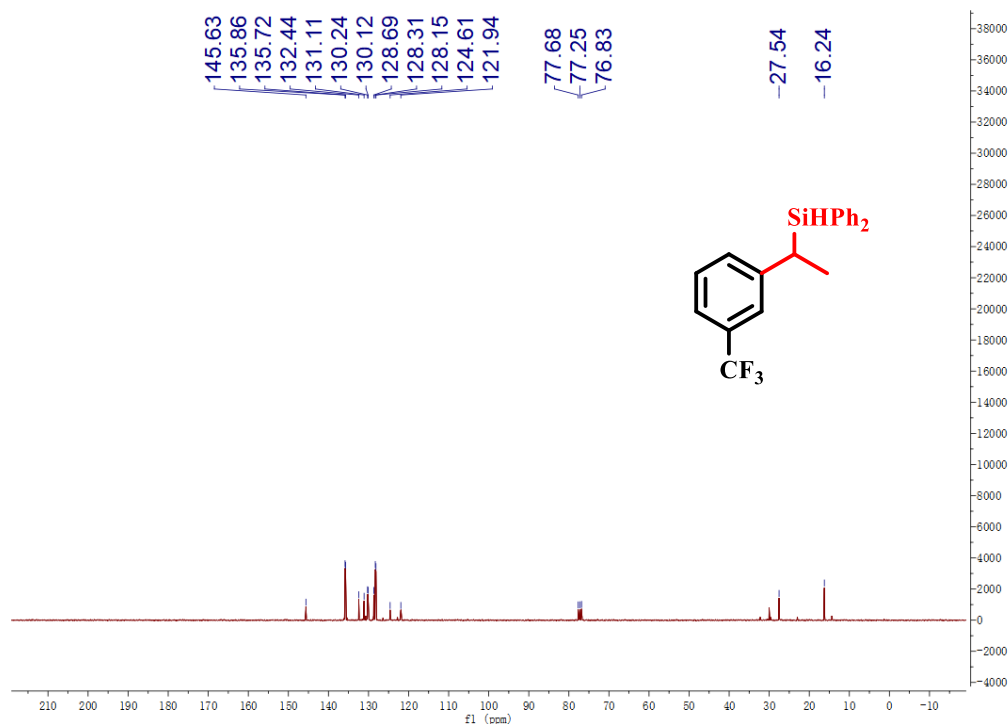

Fig.S40 <sup>13</sup>C NMR spectrum of **2s**

### Diphenyl(1-(4-(trifluoromethyl)phenyl)ethyl)silane (**2t**)<sup>3</sup>

<sup>1</sup>H NMR (300 MHz, CDCl<sub>3</sub>): δ (ppm) 7.45-7.42 (m, 3H), 7.35-7.32 (m, 1H), 7.31-7.23 (m, 5H), 7.21-7.18 (m, 2H), 7.17 (m, 1H), 7.00-6.97 (m, 2H), 4.74 (d, J = 3.0 Hz, 1H), 2.83 (qd, J = 9.0, 3.0 Hz, 1H), 1.40 (d, J = 6.0 Hz, 3H). <sup>13</sup>C NMR (75 MHz, CDCl<sub>3</sub>): δ (ppm) 135.64, 135.46, 132.24, 129.98, 129.87, 128.06, 127.90, 127.78, 125.03, 27.42, 16.11.

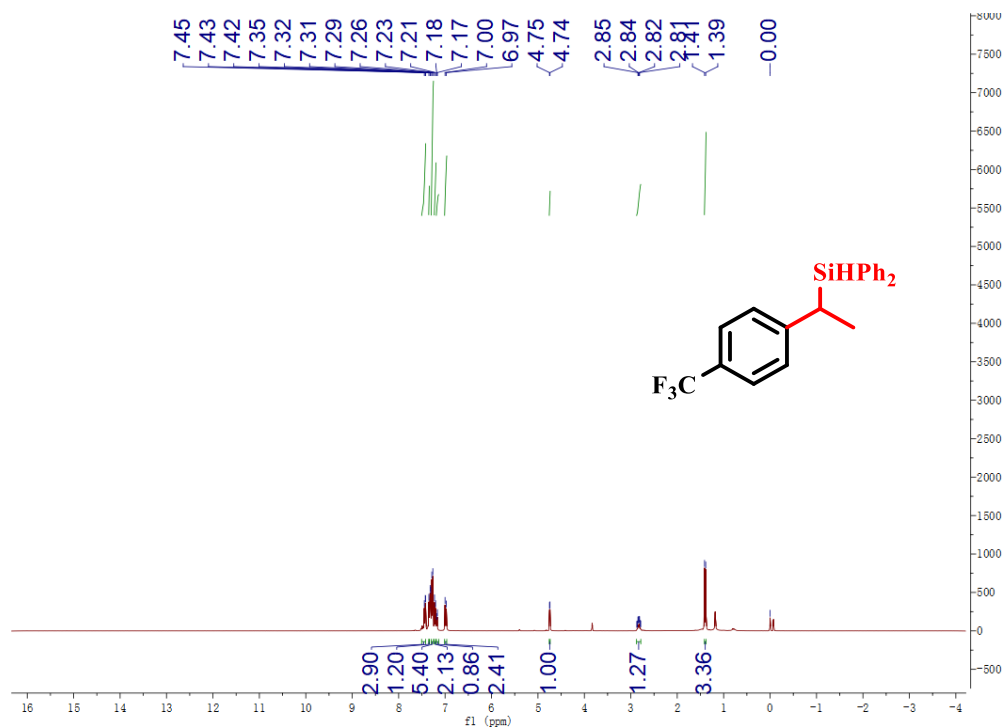

Fig.S41 <sup>1</sup>H NMR spectrum of **2t**

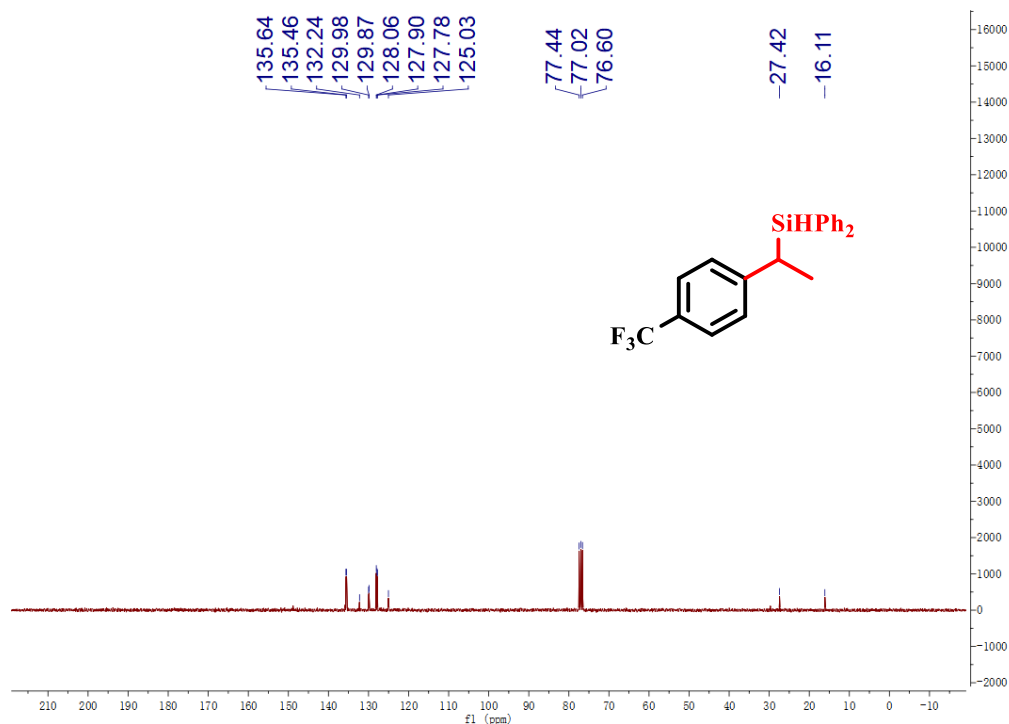

Fig.S42 <sup>13</sup>C NMR spectrum of **2t**

**(n-heptyl)diphenylsilane (3a)<sup>3</sup>**

<sup>1</sup>H NMR (300 MHz, CDCl<sub>3</sub>): δ (ppm) 7.57-7.54 (m, 4H), 7.54-7.35 (m, 5H), 7.33-7.26(m, 1H), 4.84 (t, J = 3.0 Hz, 1H), 1.54-1.46 (m, 2H), 1.43-1.10 (m, 10H), 0.86 (t, J = 6.0 Hz, 3H). <sup>13</sup>C NMR (75 MHz, CDCl<sub>3</sub>): δ (ppm) 135.12, 134.74, 129.43, 127.92, 33.11, 31.75, 29.69, 28.87, 24.39, 22.63, 14.05.

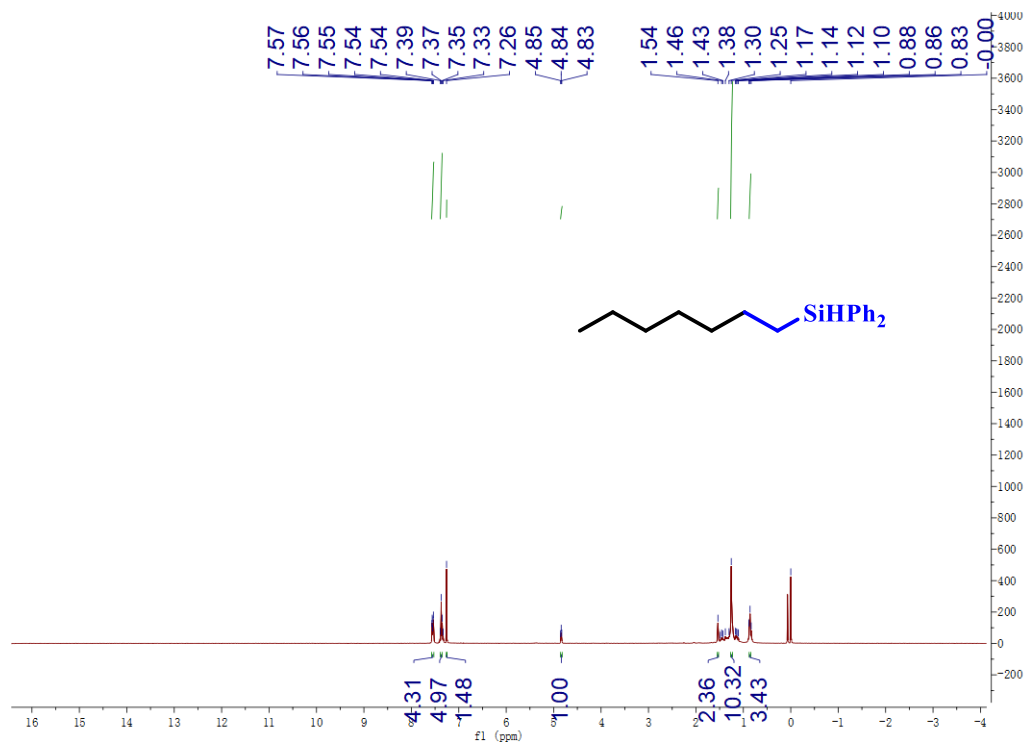

Fig.S43 <sup>1</sup>H NMR spectrum of **3a**

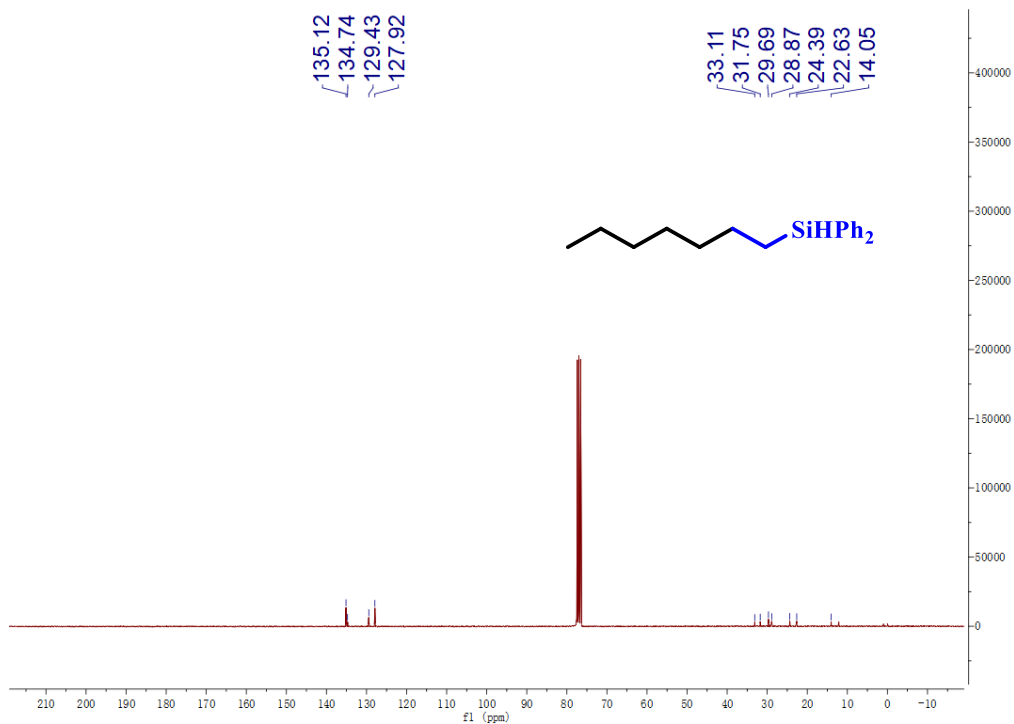

Fig.S44 <sup>13</sup>C NMR spectrum of **3a**



**(n-octyl)diphenylsilane (3b)<sup>1</sup>**

<sup>1</sup>H NMR (300 MHz, CDCl<sub>3</sub>): δ (ppm) 7.57-7.53 (m, 4H), 7.39-7.33 (m, 5H), 7.32-7.26(m, 1H), 4.84 (t, J = 3.0 Hz, 1H), 1.46-1.10 (m, 14H), 0.86 (t, J = 9.0 Hz, 3H). <sup>13</sup>C NMR (75 MHz, CDCl<sub>3</sub>): δ (ppm) 135.12, 134.74, 129.44, 127.92, 33.15, 31.87, 29.69, 29.18, 24.38, 22.64, 14.08, 12.14.

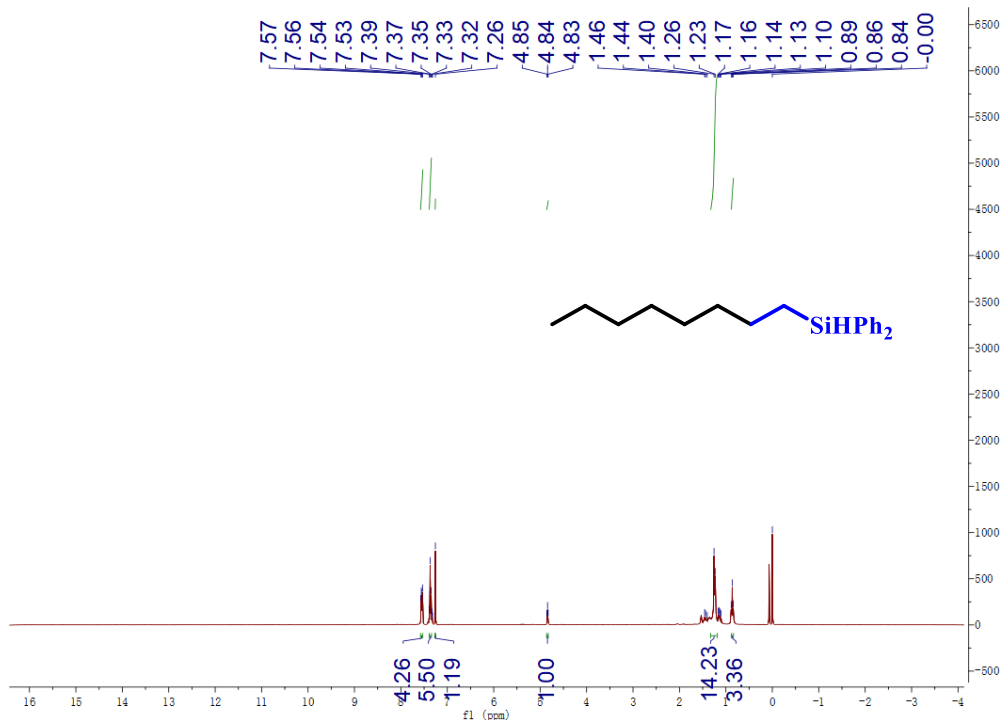

Fig.S45 <sup>1</sup>H NMR spectrum of **3b**

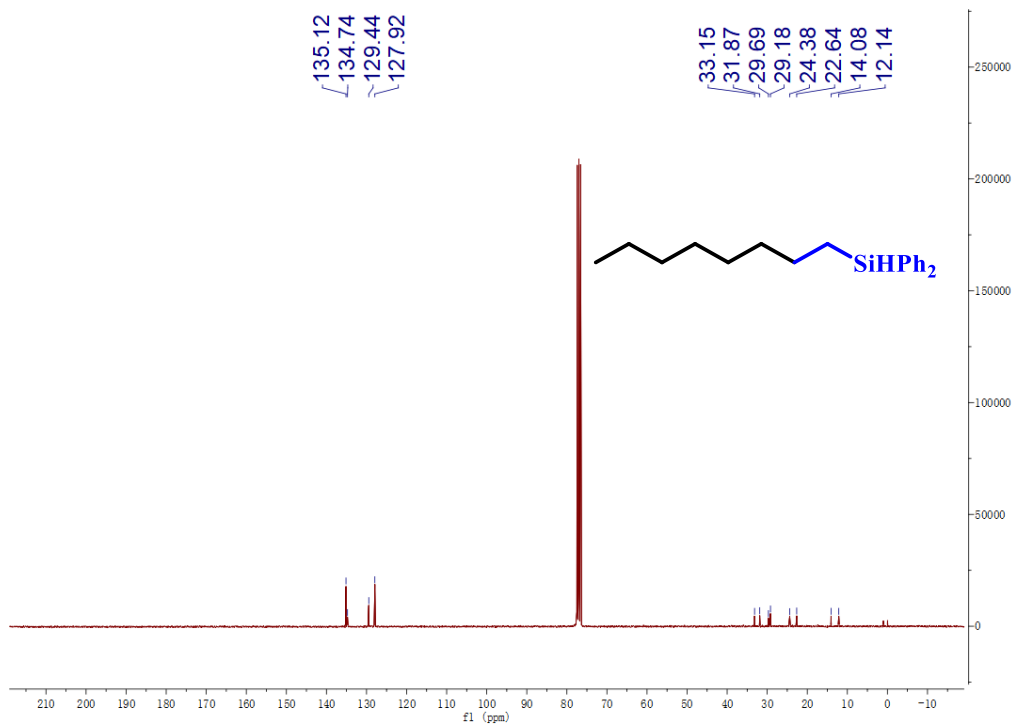

Fig.S46 <sup>13</sup>C NMR spectrum of **3b**

**(6-chlorohexyl)diphenylsilane(3c)<sup>4</sup>**

<sup>1</sup>H NMR (300 MHz, CDCl<sub>3</sub>): δ (ppm) 7.56-7.54 (m, 4H), 7.53-7.34 (m, 4H), 7.32-7.31(m, 2H), 4.85 (t, J = 3.0 Hz, 1H), 3.46 (t, J = 6.0 Hz, 2H), 1.73-1.68(m, 2H), 1.48-1.37 (m, 6H), 1.17-1.12(m, 2H). <sup>13</sup>C NMR (75 MHz, CDCl<sub>3</sub>): δ (ppm) 135.16, 134.57, 129.58, 128.03, 45.13, 32.54, 32.35, 26.50, 24.30, 12.12.

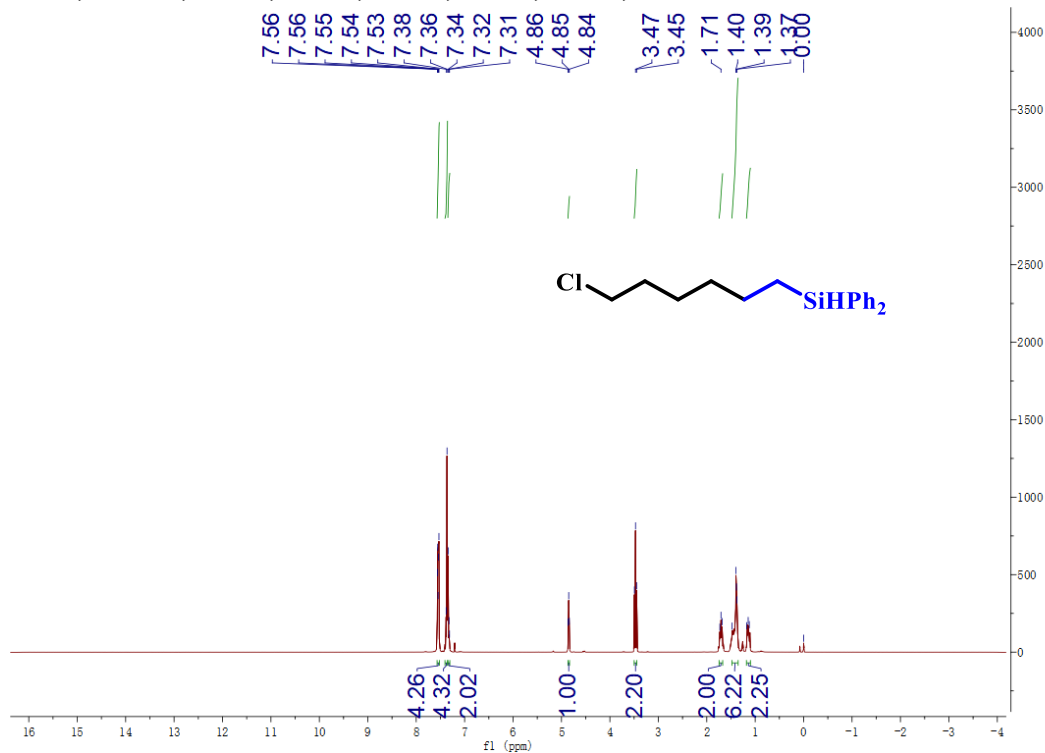

Fig.S47 <sup>1</sup>H NMR spectrum of **3c**

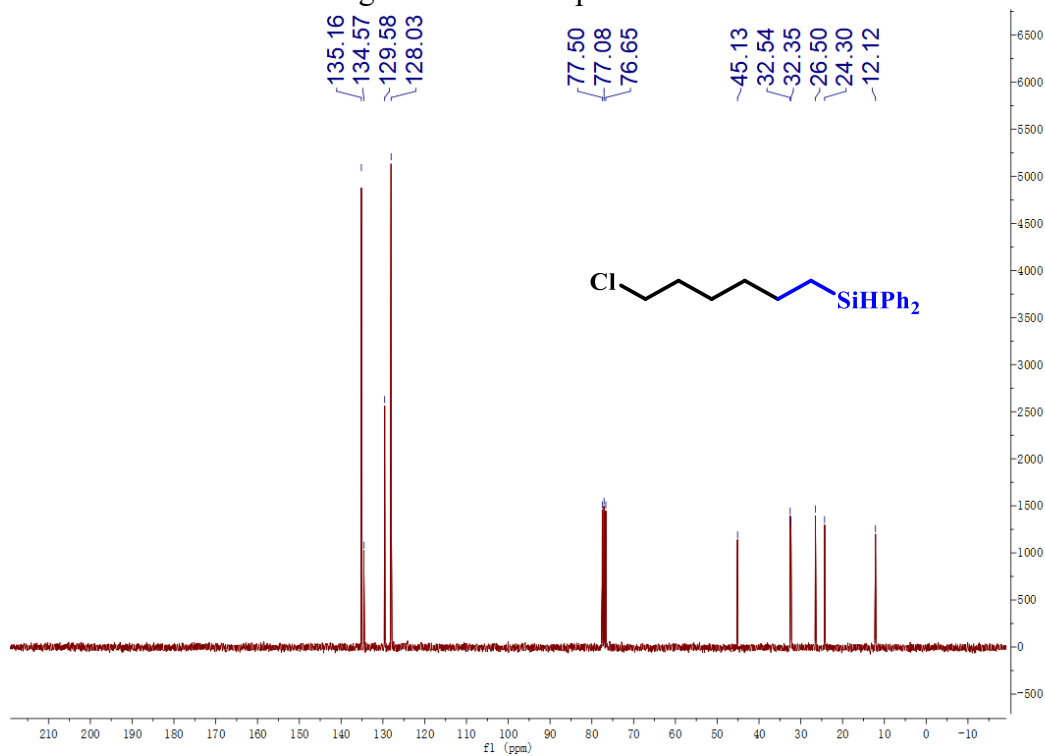

Fig.S48 <sup>13</sup>C NMR spectrum of **3c**

### Diphenyl(4-phenylbutyl)silane (**3d**)<sup>5</sup>

<sup>1</sup>H NMR (300 MHz, CDCl<sub>3</sub>): δ (ppm) 7.56-7.39 (m, 4H), 7.37-7.25 (m, 6H), 7.23-7.18 (m, 2H), 7.16-7.11 (m, 3H), 4.85 (t, J = 3.0 Hz, 1H), 2.59 (t, J = 6.0 Hz, 2H), 1.74-1.64(m, 2H), 1.57-1.47 (m, 2H), 1.25-1.15 (m, 2H). <sup>13</sup>C NMR (75 MHz, CDCl<sub>3</sub>): δ (ppm) 142.63, 135.14, 134.54, 129.83, 129.53, 128.38, 128.24, 127.98, 125.59, 35.52, 34.87, 24.12, 12.02.

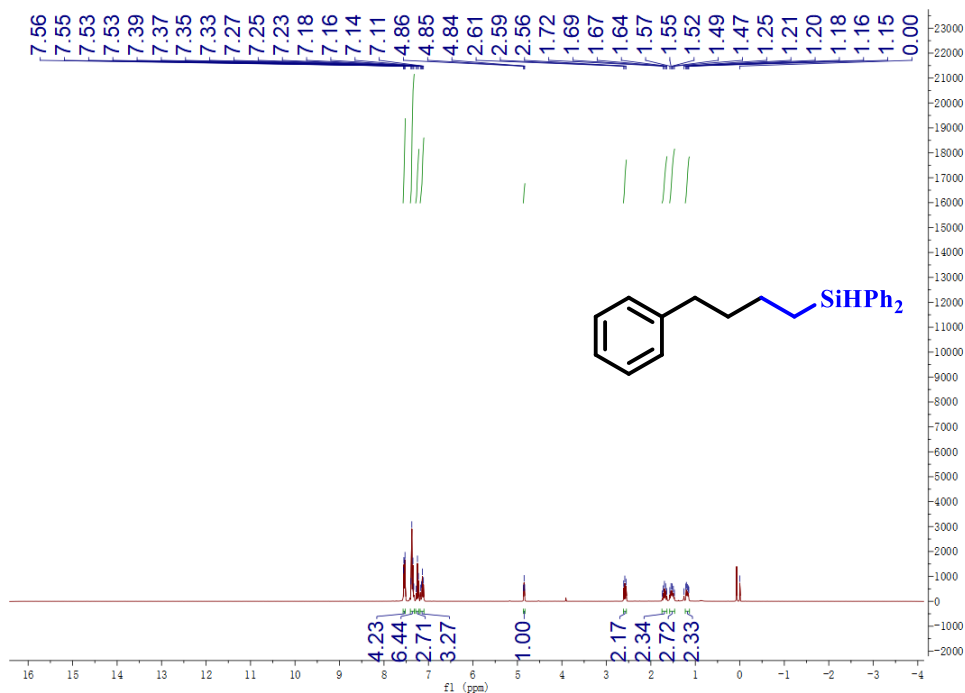

Fig.S49 <sup>1</sup>H NMR spectrum of **3d**

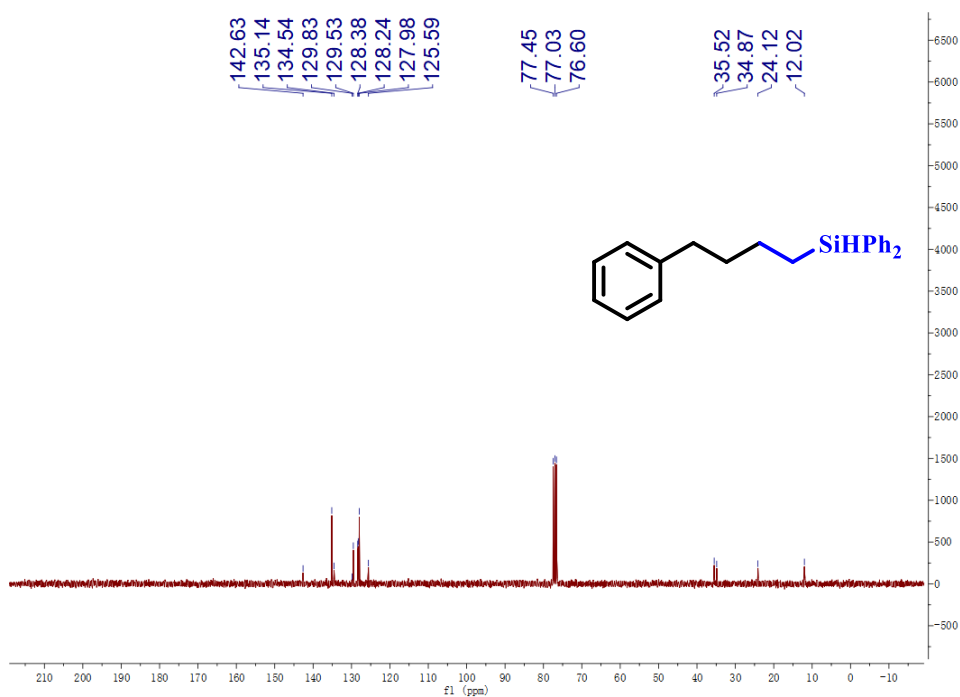

Fig.S50 <sup>13</sup>C NMR spectrum of **3d**

## S5 Reference

- 1 Y. Gao, L. Wang, L. Deng, *ACS Catal.* **2018**, *8*, 9637.
- 2 Gribble, M. W.; Pirnot, M. T.; Bandar, J. S.; Liu, R. Y.; Buchwald, S. L. *Organometallics.* **2019**, *38*, 3906.
- 3 W. Yang, Q. Fan, X. Du, S. Xie, W. Huang, X. Li, H. Sun, O. Fuhr, D. Fenske, *Organometallics.* **2021**, *40*, 2836.
- 4 Y. Toya, K. Hayasaka, H. Nakazawa, *Organometallics.* **2017**, *36*, 1727.
- 5 R. Zhou, Y. Goh, H. Liu, H. Tao, L. Li, J. Wu, *Angew. Chem. Int. Ed.* **2017**, *56*, 16621.
